# Supplementary material for: Exercise interventions for ankylosing spondylitis: a protocol for a Bayesian network meta-analysis
Source: PubMed Central journal article supplement — BMJ Open. 2019 Jun 16;9(6):e029991. doi: 10.1136/bmjopen-2019-029991 (PMC6588988; doi:10.1136/bmjopen-2019-029991), 2019-06-16
Supplement: bmjopen-2019-029991.draft_revisions.pdf [file bmjopen-2019-029991.draft_revisions.pdf]

# BMJ Open

BMJ Open is committed to open peer review. As part of this commitment we make the peer review history of every article we publish publicly available.

When an article is published we post the peer reviewers' comments and the authors' responses online. We also post the versions of the paper that were used during peer review. These are the versions that the peer review comments apply to.

The versions of the paper that follow are the versions that were submitted during the peer review process. They are not the versions of record or the final published versions. They should not be cited or distributed as the published version of this manuscript.

BMJ Open is an open access journal and the full, final, typeset and author-corrected version of record of the manuscript is available on our site with no access controls, subscription charges or pay-per-view fees (<http://bmjopen.bmj.com>).

If you have any questions on BMJ Open's open peer review process please email [info.bmjopen@bmj.com](mailto:info.bmjopen@bmj.com)

# BMJ Open

## Exercise interventions for ankylosing spondylitis: A protocol for a Bayesian network meta-analysis

|                               |                                                                                                                                                                                                                                                                                                                                                                                                                                                                          |
|-------------------------------|--------------------------------------------------------------------------------------------------------------------------------------------------------------------------------------------------------------------------------------------------------------------------------------------------------------------------------------------------------------------------------------------------------------------------------------------------------------------------|
| Journal:                      | <i>BMJ Open</i>                                                                                                                                                                                                                                                                                                                                                                                                                                                          |
| Manuscript ID                 | bmjopen-2019-029991                                                                                                                                                                                                                                                                                                                                                                                                                                                      |
| Article Type:                 | Protocol                                                                                                                                                                                                                                                                                                                                                                                                                                                                 |
| Date Submitted by the Author: | 21-Feb-2019                                                                                                                                                                                                                                                                                                                                                                                                                                                              |
| Complete List of Authors:     | Kan, Shun-Li; Tianjin Union Medical Center, Department of Spine Surgery<br>Chen, Lingxiao; University of Sydney, Institute of Bone and Joint Research, The Kolling institute, Sydney Medical School<br>Yuan, Zhi-Fang; Tianjin Medical University General Hospital, Department of Respiratory and Critical Care Medicine<br>Hu, Wei; Tianjin Union Medical Center, Department of Spine Surgery<br>Zhu, Ru-Sen; Tianjin Union Medical Center, Department of Spine Surgery |
| Keywords:                     | exercise, ankylosing spondylitis, network meta-analysis, Bayesian                                                                                                                                                                                                                                                                                                                                                                                                        |
|                               |                                                                                                                                                                                                                                                                                                                                                                                                                                                                          |

SCHOLARONE™  
Manuscripts

1  
2  
3  
4 **1 Exercise interventions for ankylosing spondylitis: A protocol for a Bayesian**  
5 **2 network meta-analysis**  
6  
7  
8  
9  
10  
11  
12

13  
14  
15  
16  
17  
18  
19  
20  
21  
22  
23  
24  
25  
26  
27  
28  
29  
30  
31  
32  
33  
34  
35  
36  
37  
38  
39  
40  
41  
42  
43  
44  
45  
46  
47  
48  
49  
50  
51  
52  
53  
54  
55  
56  
57  
58  
59  
60

4 Shun-Li Kan<sup>1</sup>, Ling-Xiao Chen<sup>2</sup>, Zhi-Fang Yuan<sup>3</sup>, Wei Hu<sup>1</sup>, Ru-Sen Zhu<sup>1</sup>

6 <sup>1</sup>Department of Spine Surgery, Tianjin Union Medical Center, 190 Jieyuan Road,  
7 Hongqiao District, Tianjin, China

8 <sup>2</sup>Institute of Bone and Joint Research, The Kolling institute, Sydney Medical School,  
9 The University of Sydney

10 <sup>3</sup>Department of Respiratory and Critical Care Medicine, Tianjin Medical University  
11 General Hospital, 154 Anshan Road, Heping District, Tianjin, China

12  
13 S-LK, L-XC and Z-FY contributed equally to this work.

14  
15 Correspondence to

16 Dr Ru-Sen Zhu;

17 rszhuspine@163.com

## 31 **ABSTRACT**

32 **Introduction:** Ankylosing spondylitis (AS) is a universal chronic inflammatory  
33 rheumatic disease which predominantly results in chronic back pain and stiffness.  
34 However, some patients suffering from AS do not react well to pharmacological  
35 interventions. Exercise intervention has been employed for the treatment of AS and  
36 works as a complementary part of the management of AS. However, the effect of  
37 different types of exercise interventions remain unclear. The purpose of this study is to  
38 determine the relative efficacy of different types of exercise interventions for  
39 individuals with AS using a Bayesian network meta-analysis.

40 **Methods and analysis:** We will comprehensively searched PubMed, EMBASE and  
41 the Cochrane Library, to include randomized controlled trials that compare different  
42 types of exercise interventions for individuals with AS. The risk of bias for individual  
43 studies will be evaluated according to the Cochrane Handbook. A Bayesian network  
44 meta-analysis will be performed to compare the efficacy of different types of exercise  
45 interventions. The quality of evidence will be assessed by GRADE.

46 **Ethics and dissemination:** Ethical approval and patient consent are not required since  
47 this study is a meta-analysis based on published studies. The results of this network  
48 meta-analysis will be submitted to a peer-reviewed journal for publication.

49 **Protocol registration number:** PROSPERO CRD42019123099.

### 50 **Strengths and limitations of this study**

- 51 ■ This is the most comprehensive review comparing the efficacy of different types  
52 of exercise interventions for individuals with AS through a Bayesian network meta-  
53 analysis.
- 54 ■ We will use the Grading of Recommendations Assessment, Development and  
55 Evaluation (GRADE) approach to evaluate the quality of evidence.
- 56 ■ The results of this study will help physical therapists and patients to select  
57 appropriate exercise interventions.
- 58 ■ This study is based on the quantity and quality of the trials available for review.

59  
60

## 61 INTRODUCTION

62 Ankylosing spondylitis (AS) is a universal chronic inflammatory rheumatic disease  
63 which predominantly influences the axial skeleton (e.g., spine, hips and shoulders).<sup>1 2</sup>  
64 AS is characterized by inflammatory back pain which is caused by sacroiliitis and  
65 spondylitis.<sup>1</sup> Inflammatory back pain may happen in 70% to 80% of patients with AS.  
66 AS commonly starts early and about 10% to 20% of patients with AS commence to  
67 develop the first symptoms before 16 years of age.<sup>3 4</sup> It has reported that estimates for  
68 the prevalence of AS vary from 0.01% to 1.8%.<sup>5</sup> Patients with AS often experience  
69 chronic back pain, stiffness, arthritis and enthesitis, which seriously affect patients'  
70 health and quality of life, disturb their recreational activities, work, family life and  
71 relationships, and result in considerable psychological distress and fears.

72 Non-steroidal anti-inflammatory drugs (NSAIDs), including COX-2 inhibitors,  
73 are recommended as the first-line drug intervention for reducing pain and stiffness.  
74 Biological disease modifying antirheumatic drugs have also proved effective for the  
75 manage inhibitors, the anti-interleukin-17 inhibitor, and so on.<sup>6</sup> However, some patients  
76 suffering from AS do not react well to pharmacological interventions.<sup>7</sup> Exercise is  
77 recommended by several guidelines as a co-intervention in combination with  
78 pharmacological interventions to treat patients with AS.<sup>2 8</sup> Previous systematic  
79 reviews<sup>9-11</sup> demonstrated that exercises have significant positive effects on pain, spinal  
80 mobility, and physical function. However, they did not classify different types of  
81 exercise, such as group exercise, individualized exercise, supervised exercise, home-  
82 based exercise, and so on. Therefore, we do not know which is the best one. When no  
83 studies exist that directly compare all relevant treatment choices, a network meta-  
84 analysis can be performed by comparing the relative effects of treatments against a  
85 common comparator or combining a variety of comparisons that are taken together  
86 from one or more chains linking the treatments of interest.<sup>12</sup>

87 Therefore, the purpose of this study is to comprehensively review the literature and  
88 determine the relative efficacy of different types of exercise interventions for  
89 individuals with AS using a Bayesian network meta-analysis.

90

## 91 **METHODS**

### 92 **Design**

93 A network meta-analysis using a Bayesian framework will be implemented in this study.  
94 This protocol of network meta-analysis will be performed on the basis of the Preferred  
95 Reporting Items for Systematic review and Meta-Analysis Protocol (PRISMA-P),<sup>13</sup> and  
96 the reporting of the following network meta-analysis will obey the PRISMA extension  
97 statement for reporting of systematic reviews incorporating network meta-analysis of  
98 health care interventions.<sup>14</sup> This study has been registered at PROSPERO  
99 (<http://www.crd.york.ac.uk/PROSPERO>) with registration number CRD42019123099.

100

### 101 **Eligibility criteria**

#### 102 1. Type of study

103 We will include randomized controlled trials. For cross-over studies, we only use the  
104 data before wash-out period. We will not restrain the language or date of publication.

#### 105 2. Participants

106 Trials enrolling adults, aged at least 18 years, with a diagnosis of AS according to the  
107 Modified New York criteria<sup>15</sup> or the Amor criteria<sup>16</sup> or radiographic axial  
108 spondyloarthritis (SpA) according to the criteria for axial SpA defined by the  
109 Assessment of Spondyloarthritis International Society (ASAS)<sup>17</sup> will be included.

110 We will exclude studies involving participants with non-radiographic axial SpA  
111 according to the criteria for axial SpA defined by the ASAS.

#### 112 3. Type of interventions

113 Any type of exercise interventions will be included. Exercise intervention is defined as  
114 a type of physical activity that is planned, structured and repeated over a period of  
115 time.<sup>18</sup>

116 Trials that compare an exercise intervention combined with a co-intervention  
117 versus the co-intervention alone or the exercise intervention alone (e.g., an exercise  
118 intervention plus anti-TNF $\alpha$  therapy versus anti-TNF $\alpha$  therapy alone, an exercise  
119 intervention plus spa therapy versus the exercise intervention) will be considered.

120 Trails investigating exercise interventions with different setting (home, hospital, or

1  
2  
3  
4 121 elsewhere) or different delivery method (individual, group, supervision, or mixed) will  
5  
6 122 be included.

7  
8 123 Trials comparing an exercise intervention with no treatment, standard care or usual  
9  
10 124 physical activity will be considered.

#### 11 125 4. Outcomes of interest

##### 12 126 4.1 Primary outcomes

13 127 The Bath Ankylosing Spondylitis Functional Index (BASFI)<sup>19</sup> is 10 item index that  
14  
15 128 evaluate the functional capacity in performing daily activities of patients with AS.  
16  
17 129 Higher score of the BASFI reflects greater impairment in functional capacity.

18  
19 130 Pain will be measured based on a visual analogue scale (VAS) or numerical rating  
20  
21 131 scale (NRS). We will record data on back pain at night, total back pain, overall pain at  
22  
23 132 night, or overall pain. And the highest pain score on numeric value will be regarded as  
24  
25 133 the final pain score.

26  
27 134 The Bath Ankylosing Spondylitis Disease Activity Index (BASDAI)<sup>20</sup> is the gold  
28  
29 135 standard for measuring and evaluating disease activity in AS. Higher score of the  
30  
31 136 BASDAI indicates greater disease activity.

##### 32 137 4.2 Secondary outcomes

33 138 The Medical Outcomes Study 36-Item Short-Form General Health Survey (SF-36) will  
34  
35 139 be used to evaluate the quality of life, with higher scores indicating better quality of  
36  
37 140 life.

38  
39 141 The Bath Ankylosing Spondylitis Metrology Index (BASMI)<sup>21</sup> is the most widely  
40  
41 142 reported, validated objective axial mobility measure, which consists of five steps:  
42  
43 143 cervical rotation, tragus to wall distance, lumbar side flexion, modified Schober's test  
44  
45 144 and intermalleolar distance. High scores mean severer limitation of movement.

46  
47 145

#### 48 146 **Data sources and search strategy**

49  
50 147 We will systematically search PubMed, EMBASE and the Cochrane Library for  
51  
52 148 primary studies up to February 2019. The search strategy will combine free text words  
53  
54 149 and medical subject headings regarding exercise, spondyloarthritis and randomized  
55  
56 150 controlled trials. The detail of the search strategy for PubMed is shown in online

1  
2  
3  
4 151 supplementary file S1. This search strategy will be modified as required for other  
5  
6 152 databases. Furthermore, we will also retrieve the World Health Organization (WHO)  
7  
8 153 International Clinical Trials Registry Platform and ClinicalTrials.gov to identify  
9  
10 154 ongoing trial registers. We will examine bibliographies of pertinent systematic reviews  
11  
12 155 and meta-analyses for additional related studies. We will not limit language of  
13  
14 156 publication or publication period.

15  
16 157

### 17 158 **Study selection**

19 159 Two reviewers will independently check the titles and abstracts through the initial  
20  
21 160 retrieval. Publications not fulfilling the eligibility criteria will be eliminated. After  
22  
23 161 excluding the irrelevant publications, we will examine the full text of the remaining  
24  
25 162 publications based on the same eligibility criteria. Any discrepancies will be settled by  
26  
27 163 discussion and consensus. Excluded publications and the reasons for exclusion will be  
28  
29 164 reported and confirmed by a third investigator.

30  
31 165

### 32 166 **Data extraction**

34 167 Data from included publications will be independently extracted by two reviewers using  
35  
36 168 a standardized data abstraction list. The following characteristic information will be  
37  
38 169 extracted: study characteristics (first author, publication year, study year, number of  
39  
40 170 centers, country and sponsor), patient characteristics (sample size, mean age, gender  
41  
42 171 ratio, the stage of the disease, and inclusion/exclusion criteria), intervention details for  
43  
44 172 each treatment group (e.g., number of intervention groups, exercise modality and the  
45  
46 173 detailed description, frequency and duration of the intervention, the duration of follow-  
47  
48 174 up, and co-interventions) and outcome measures (BASFI, BASDAI, BASMI, pain, and  
49  
50 175 SF-36). Numerical data will be extracted to calculate pooled estimations. If the data are  
51  
52 176 not reported in the texts directly, we will infer them from the associated graphs. Any  
53  
54 177 disagreements will be settled by discussion and consensus.

55  
56 178

### 57 179 **Risk of bias assessment**

58  
59 180 The Cochrane Risk of Bias Tool will be used to appraise the risk of bias for individual  
60



1  
2  
3  
4 181 studies.<sup>22</sup> Each study will be evaluated and scored as high, low, or unclear risk of bias  
5  
6 182 based on the following criteria: randomization, allocation concealment, blinding of  
7  
8 183 participants and personnel, blinding of outcome assessors, incomplete outcome data,  
9  
10 184 selective reporting and other biases. A study with a high risk of bias in one or more  
11  
12 185 domains will be viewed as high risk of bias. A study with a low risk of bias in all  
13  
14 186 domains will be considered as low risk of bias. If not, a study will be treated as unclear  
15  
16 187 risk of bias. Any disagreements were resolved by discussion and consensus.

17  
18 188

### 19 189 **Statistical analysis**

20  
21 190 A traditional pairwise meta-analysis will be done when at least two studies exist for an  
22  
23 191 outcome. A random-effects model with DerSimonian and Laird inverse-variance  
24  
25 192 method will be used to estimate pooled mean difference (MD) and 95% confidence  
26  
27 193 interval (CI) accounting for methodological and clinical heterogeneity across studies,  
28  
29 194 with Review Manager, version 5.3 (The Nordic Cochrane Centre, The Cochrane  
30  
31 195 Collaboration, Copenhagen, 2014).<sup>23</sup> The extent of between-trial heterogeneity will be  
32  
33 196 assessed with  $I^2$  statistic, with values over 50% indicating considerable heterogeneity.<sup>24</sup>

34  
35 197 We will perform network meta-analyses to merge direct and indirect comparisons.  
36  
37 198 All network meta-analyses will be conducted using a Bayesian Markov chain Monte  
38  
39 199 Carlo (MCMC) framework in R version 3.2.5 software ([https://cran.r-](https://cran.r-project.org/src/base/R-3/)  
40  
41 200 [project.org/src/base/R-3/](https://cran.r-project.org/src/base/R-3/)) via the gemtc version 0.8-2 package. MD and 95% credible  
42  
43 201 interval (CrI) will be used as summary statistics to quantify the effect of different  
44  
45 202 exercise interventions. Random-effects and consistency models will be adopted in this  
46  
47 203 network meta-analysis, as they are considered to be the most conservative approach to  
48  
49 204 dealing with between-study heterogeneity.<sup>25</sup> To generate posterior distributions of  
50  
51 205 model parameters, 150 000 iterations of MCMC after 50 000 tuning iterations in three  
52  
53 206 chains will be run.<sup>26</sup> Convergence of iterations will be examined with the Gelman-  
54  
55 207 Rubin-Brooks diagnostic plots.<sup>27</sup> For any specific outcome, we will rank the probability  
56  
57 208 of each intervention being the best (superior to all other interventions), second best,  
58  
59 209 third best, etc.

60 210 The posterior mean residual deviance, an absolute measure of fit, will be computed.

1  
2  
3  
4 211 The value of posterior mean residual deviance and the number of independent data  
5  
6 212 points will be assessed to check if the model fits the data satisfactorily.<sup>28</sup> To appraise  
7  
8 213 the consistency, we will use the following methods. Firstly, the model fit from the  
9  
10 214 consistency model will be compared with that from the inconsistency model.<sup>29</sup>  
11  
12 215 Secondly, network meta-analysis results (indirect evidence using the node-split  
13  
14 216 approach) will be compared with pairwise meta-analysis results (direct evidence in a  
15  
16 217 frequentist framework).<sup>30</sup>

17  
18 218 Clinical and methodological heterogeneity will be evaluated by checking the  
19  
20 219 characteristics and design of the included studies. Statistical heterogeneity in the  
21  
22 220 network will be assessed according to the heterogeneity parameter ( $I^2$  or  $\tau^2$ ) derived  
23  
24 221 from the network meta-analysis.  $I^2$  more than 50% indicates substantial heterogeneity.  
25  
26 222 Heterogeneity will be explored by fitting covariates (ie, mean age, sample size, the  
27  
28 223 duration of symptoms, the dose of exercise (frequency  $\times$  duration intensity), and the  
29  
30 224 duration of follow-up) in network meta-regression analyses.<sup>31</sup> Subgroup analyses will  
31  
32 225 be further conducted ground on the duration of symptoms (early or long-term disease)  
33  
34 226 and concomitant pharmacological treatment (anti-TNF agents, NSAIDs, or other  
35  
36 227 pharmacological interventions), if possible. Sensitivity analyses will be executed to test  
37  
38 228 the robustness of outcomes by limiting analyses to studies with low risk of bias.

39  
40 229 To examine the potential of small-study effects in the network, comparison-  
41  
42 230 adjusted funnel plots will be produced.<sup>32</sup> For the comparison-adjusted funnel plot, the  
43  
44 231 horizontal axis will represent the difference between study-specific effect sizes and the  
45  
46 232 comparison-specific summary effect. In the absence of small-study effects, the  
47  
48 233 comparison-adjusted funnel plot should be symmetric around the zero line.

49 234

### 50 235 **Quality of evidence**

51  
52 236 We will follow the Grading of Recommendations, Assessment, Development and  
53  
54 237 Evaluation (GRADE) four-step approach to grade the quality of treatment effect  
55  
56 238 estimations from network meta-analysis.<sup>33</sup> Firstly, present direct and indirect treatment  
57  
58 239 estimates for each comparison of the evidence network. Secondly, rate the quality of  
59  
60 240 each direct and indirect effect estimate. Then, present the network meta-analysis

1  
2  
3  
4 241 estimate for each comparison of the evidence network. At last, rate the quality of each  
5  
6 242 network meta-analysis effect estimate. According to risk of bias, inconsistency,  
7  
8 243 indirectness, imprecision and publication bias, the quality of evidence will be graded as  
9  
10 244 high, moderate, low, or very low.

11  
12 245

## 13 246 **ETHICS AND DISSEMINATION**

### 14 15 247 **Ethical issues**

16  
17 248 As no primary data collection will be undertaken, no additional formal ethical  
18  
19 249 assessment and no informed consent are required.

20  
21 250

### 22 23 251 **Publication plan**

24  
25 252 This network meta-analysis will be submitted to a peer-reviewed journal. It will be  
26  
27 253 disseminated electronically and in print.

28  
29 254

30  
31 255 **Contributors** S-LK, L-XC, Z-FY and R-SZ participated in the conception and design  
32  
33 256 of the study, including search strategy development. L-XC, Z-FY and WH tested the  
34  
35 257 feasibility of the study. S-LK wrote the manuscript. All the authors critically reviewed  
36  
37 258 this manuscript and approved the final version.

38  
39 259

40  
41 260 **Funding** This work was supported by Tianjin Municipal Science and Technology  
42  
43 261 Commission (16KG158), and Foundation of Tianjin Union Medical Center  
44  
45 262 (2018YJ010). The funders had no role in study design, data collection and analysis,  
46  
47 263 decision to publish, or preparation of the manuscript.

48  
49 264

50  
51 265 **Competing interests** None declared.

52  
53 266

54  
55 267 **Provenance and peer review** Not commissioned; externally peer reviewed.

56  
57 268

## 58 269 **REFERENCES**

59  
60 270 1. Baraliakos X, Haibel H, Listing J, et al. Continuous long-term anti-TNF therapy does not lead to an

- 1  
2  
3 271 increase in the rate of new bone formation over 8 years in patients with ankylosing spondylitis.  
4 272 *Ann Rheum Dis* 2014;73(4):710-5. doi: 10.1136/annrheumdis-2012-202698 [published Online  
5 273 First: 2013/03/19]
- 7 274 2. van der Heijde D, Ramiro S, Landewe R, et al. 2016 update of the ASAS-EULAR management  
8 275 recommendations for axial spondyloarthritis. *Ann Rheum Dis* 2017;76(6):978-91. doi:  
9 276 10.1136/annrheumdis-2016-210770 [published Online First: 2017/01/15]
- 11 277 3. Colbert RA. Classification of juvenile spondyloarthritis: Enthesitis-related arthritis and beyond.  
12 278 *Nature reviews Rheumatology* 2010;6(8):477-85. doi: 10.1038/nrrheum.2010.103 [published  
13 279 Online First: 2010/07/08]
- 15 280 4. Ramanathan A, Srinivasalu H, Colbert RA. Update on juvenile spondyloarthritis. *Rheumatic diseases*  
16 281 *clinics of North America* 2013;39(4):767-88. doi: 10.1016/j.rdc.2013.06.002 [published Online  
17 282 First: 2013/11/05]
- 19 283 5. van Tubergen A. The changing clinical picture and epidemiology of spondyloarthritis. *Nature reviews*  
20 284 *Rheumatology* 2015;11(2):110-8. doi: 10.1038/nrrheum.2014.181 [published Online First:  
21 285 2014/11/12]
- 23 286 6. Taurog JD, Chhabra A, Colbert RA. Ankylosing Spondylitis and Axial Spondyloarthritis. *The New*  
24 287 *England journal of medicine* 2016;374(26):2563-74. doi: 10.1056/NEJMra1406182 [published  
25 288 Online First: 2016/06/30]
- 27 289 7. Sieper J, Braun J, Dougados M, et al. Axial spondyloarthritis. *Nature reviews Disease primers*  
28 290 2015;1:15013. doi: 10.1038/nrdp.2015.13 [published Online First: 2015/01/01]
- 29 291 8. Ward MM, Deodhar A, Akl EA, et al. American College of Rheumatology/Spondylitis Association of  
30 292 America/Spondyloarthritis Research and Treatment Network 2015 Recommendations for the  
31 293 Treatment of Ankylosing Spondylitis and Nonradiographic Axial Spondyloarthritis. *Arthritis &*  
32 294 *rheumatology (Hoboken, NJ)* 2016;68(2):282-98. doi: 10.1002/art.39298 [published Online  
33 295 First: 2015/09/25]
- 36 296 9. Dagfinrud H, Kvien TK, Hagen KB. Physiotherapy interventions for ankylosing spondylitis. *The*  
37 297 *Cochrane database of systematic reviews* 2008@(1):Cd002822. doi:  
38 298 10.1002/14651858.CD002822.pub3 [published Online First: 2008/02/07]
- 40 299 10. Martins NA, Furtado GE, Campos MJ, et al. Exercise and ankylosing spondylitis with New York  
41 300 modified criteria: a systematic review of controlled trials with meta-analysis. *Acta*  
42 301 *reumatologica portuguesa* 2014@;39(4):298-308. [published Online First: 2014/10/30]
- 44 302 11. Pecourneau V, Degboe Y, Barnetche T, et al. Effectiveness of Exercise Programs in Ankylosing  
45 303 Spondylitis: A Meta-Analysis of Randomized Controlled Trials. *Archives of physical medicine*  
46 304 *and rehabilitation* 2018@;99(2):383-89.e1. doi: 10.1016/j.apmr.2017.07.015 [published  
47 305 Online First: 2017/09/02]
- 49 306 12. Lu G, Ades AE. Combination of direct and indirect evidence in mixed treatment comparisons.  
50 307 *Statistics in medicine* 2004;23(20):3105-24. doi: 10.1002/sim.1875 [published Online First:  
51 308 2004/09/28]
- 53 309 13. Moher D, Shamseer L, Clarke M, et al. Preferred reporting items for systematic review and meta-  
54 310 analysis protocols (PRISMA-P) 2015 statement. *Systematic reviews* 2015;4:1. doi:  
55 311 10.1186/2046-4053-4-1 [published Online First: 2015/01/03]
- 57 312 14. Hutton B, Salanti G, Caldwell DM, et al. The PRISMA extension statement for reporting of systematic  
58 313 reviews incorporating network meta-analyses of health care interventions: checklist and  
59 314 explanations. *Ann Intern Med* 2015;162(11):777-84. doi: 10.7326/m14-2385 [published Online

1  
2  
3  
4  
5  
6  
7  
8  
9  
10  
11  
12  
13  
14  
15  
16  
17  
18  
19  
20  
21  
22  
23  
24  
25  
26  
27  
28  
29  
30  
31  
32  
33  
34  
35  
36  
37  
38  
39  
40  
41  
42  
43  
44  
45  
46  
47  
48  
49  
50  
51  
52  
53  
54  
55  
56  
57  
58  
59  
60

- 315 First: 2015/06/02]
- 316 15. van der Linden S, Valkenburg HA, Cats A. Evaluation of diagnostic criteria for ankylosing spondylitis.  
317 A proposal for modification of the New York criteria. *Arthritis Rheum* 1984;27(4):361-8.  
318 [published Online First: 1984/04/01]
- 319 16. Amor B, Dougados M, Mijiyawa M. Criteria of the classification of spondylarthropathies. *Revue du*  
320 *rhumatisme et des maladies osteo-articulaires* 1990;57(2):85-9. [published Online First:  
321 1990/02/01]
- 322 17. Rudwaleit M, van der Heijde D, Landewe R, et al. The development of Assessment of  
323 SpondyloArthritis international Society classification criteria for axial spondyloarthritis (part  
324 II): validation and final selection. *Ann Rheum Dis* 2009;68(6):777-83. doi:  
325 10.1136/ard.2009.108233 [published Online First: 2009/03/20]
- 326 18. Bouchard C, Blair S, Haskell W. Physical Activity and Health. Human Kinetics, Inc, 2007.
- 327 19. Calin A, Garrett S, Whitelock H, et al. A new approach to defining functional ability in ankylosing  
328 spondylitis: the development of the Bath Ankylosing Spondylitis Functional Index. *The Journal*  
329 *of rheumatology* 1994;21(12):2281-5. [published Online First: 1994/12/01]
- 330 20. Garrett S, Jenkinson T, Kennedy LG, et al. A new approach to defining disease status in ankylosing  
331 spondylitis: the Bath Ankylosing Spondylitis Disease Activity Index. *The Journal of*  
332 *rheumatology* 1994;21(12):2286-91. [published Online First: 1994/12/01]
- 333 21. Jenkinson TR, Mallorie PA, Whitelock HC, et al. Defining spinal mobility in ankylosing spondylitis (AS).  
334 The Bath AS Metrology Index. *The Journal of rheumatology* 1994;21(9):1694-8. [published  
335 Online First: 1994/09/01]
- 336 22. Higgins JP, Altman DG, Gotzsche PC, et al. The Cochrane Collaboration's tool for assessing risk of  
337 bias in randomised trials. *Bmj* 2011;343:d5928. doi: 10.1136/bmj.d5928 [published Online  
338 First: 2011/10/20]
- 339 23. DerSimonian R, Laird N. Meta-analysis in clinical trials. *Controlled clinical trials* 1986;7(3):177-88.  
340 [published Online First: 1986/09/01]
- 341 24. Higgins JP, Thompson SG, Deeks JJ, et al. Measuring inconsistency in meta-analyses. *Bmj*  
342 2003;327(7414):557-60. doi: 10.1136/bmj.327.7414.557 [published Online First: 2003/09/06]
- 343 25. Mills EJ, Thorlund K, Ioannidis JP. Demystifying trial networks and network meta-analysis. *Bmj*  
344 2013;346:f2914. doi: 10.1136/bmj.f2914 [published Online First: 2013/05/16]
- 345 26. Toft N, Innocent GT, Gettinby G, et al. Assessing the convergence of Markov Chain Monte Carlo  
346 methods: an example from evaluation of diagnostic tests in absence of a gold standard.  
347 *Preventive veterinary medicine* 2007;79(2-4):244-56. doi: 10.1016/j.prevetmed.2007.01.003  
348 [published Online First: 2007/02/13]
- 349 27. Gelman A, Rubin DB. Markov chain Monte Carlo methods in biostatistics. *Statistical methods in*  
350 *medical research* 1996;5(4):339-55. [published Online First: 1996/12/01]
- 351 28. Dias S, Sutton AJ, Ades AE, et al. Evidence synthesis for decision making 2: a generalized linear  
352 modeling framework for pairwise and network meta-analysis of randomized controlled trials.  
353 *Medical decision making : an international journal of the Society for Medical Decision Making*  
354 2013;33(5):607-17. doi: 10.1177/0272989x12458724 [published Online First: 2012/10/30]
- 355 29. Dias S, Welton NJ, Sutton AJ, et al. Evidence synthesis for decision making 4: inconsistency in  
356 networks of evidence based on randomized controlled trials. *Medical decision making : an*  
357 *international journal of the Society for Medical Decision Making* 2013;33(5):641-56. doi:  
358 10.1177/0272989x12455847 [published Online First: 2013/06/28]

- 1  
2  
3 359 30. Dias S, Welton NJ, Caldwell DM, et al. Checking consistency in mixed treatment comparison meta-  
4 360 analysis. *Statistics in medicine* 2010;29(7-8):932-44. doi: 10.1002/sim.3767 [published Online  
5 361 First: 2010/03/10]  
6  
7 362 31. Dias S, Sutton AJ, Welton NJ, et al. Evidence synthesis for decision making 3: heterogeneity--  
8 363 subgroups, meta-regression, bias, and bias-adjustment. *Medical decision making : an*  
9 364 *international journal of the Society for Medical Decision Making* 2013;33(5):618-40. doi:  
10 365 10.1177/0272989x13485157 [published Online First: 2013/06/28]  
11  
12 366 32. Chaimani A, Higgins JP, Mavridis D, et al. Graphical tools for network meta-analysis in STATA. *PLoS*  
13 367 *One* 2013;8(10):e76654. doi: 10.1371/journal.pone.0076654 [published Online First:  
14 368 2013/10/08]  
15  
16 369 33. Puhan MA, Schunemann HJ, Murad MH, et al. A GRADE Working Group approach for rating the  
17 370 quality of treatment effect estimates from network meta-analysis. *Bmj* 2014;349:g5630. doi:  
18 371 10.1136/bmj.g5630 [published Online First: 2014/09/26]  
19  
20 372

**PubMed**

---

- 1  
2  
3  
4  
5  
6  
7 #1 "Randomized Controlled Trial" [Publication Type] OR "Controlled Clinical Trial" [Publication Type]  
8  
9 #2 (((placebo[Title/Abstract]) OR randomized[Title/Abstract]) OR randomly[Title/Abstract]) OR trial[Title/Abstract]) OR  
10 groups[Title/Abstract]  
11  
12 #3 ("Animals"[Mesh]) NOT "Humans"[Mesh]  
13  
14 #4 (#1 OR #2) NOT #3  
15  
16 #5 "Spondylarthritis"[Mesh]  
17  
18 #6 "Spondylitis, Ankylosing"[Mesh]  
19  
20 #7 "Sacroiliitis"[Mesh]  
21  
22 #8 (((Bechterew Disease[Title/Abstract]) OR Marie-Struempell Disease[Title/Abstract]) OR Ankylosing Spondylitis[Title/Abstract])  
23 OR AS[Title/Abstract]) OR axSpA[Title/Abstract]) OR axial spondyloarthritis[Title/Abstract]  
24  
25 #9 (((axial[Title/Abstract]) OR spin\*[Title/Abstract]) OR peripheral[Title/Abstract]) OR vertebral[Title/Abstract]  
26  
27 #10 (((joint\*[Title/Abstract]) OR spondyloarthritis[Title/Abstract]) OR arthritis[Title/Abstract]) OR ankylosing[Title/Abstract]  
28  
29 #11 #9 AND #10  
30  
31 #12 #5 OR #6 OR #7 OR #8 OR #11  
32  
33 #13 "Exercise"[Mesh]  
34  
35 #14 "Exercise Therapy"[Mesh]  
36  
37  
38  
39  
40  
41  
42  
43  
44  
45  
46
-

- 
- 1  
2  
3  
4
- 5 #15 "Exercise Movement Techniques"[Mesh]  
6  
7 #16 "Physical Therapy Modalities"[Mesh]  
8  
9 #17 "Motor Activity"[Mesh]  
10  
11 #18 "Rehabilitation"[Mesh]  
12  
13 #19 "Proprioception"[Mesh]  
14  
15 #20 (((((program\*[Title/Abstract]) OR therap\*[Title/Abstract]) OR behavior\*[Title/Abstract]) OR intervention\*[Title/Abstract]) OR  
16 train\*[Title/Abstract]) OR activit\*[Title/Abstract])  
17  
18 #21 exercise AND #20  
19  
20 #22 physical AND #20  
21  
22 #23 (((AS[Title/Abstract]) OR non drug\*[Title/Abstract]) OR non pharmacological\*[Title/Abstract]) OR complementary[Title/Abstract]  
23  
24 #24 ((management[Title/Abstract]) OR intervention\*[Title/Abstract]) OR treatment\*[Title/Abstract]  
25  
26 #25 #23 AND #24  
27  
28 #26 ((((((Train\*[Title/Abstract]) OR exercise\*[Title/Abstract]) OR therap\*[Title/Abstract]) OR fitness[Title/Abstract]) OR  
29 program\*[Title/Abstract]) OR reeducation[Title/Abstract]) OR rehab\*[Title/Abstract])  
30  
31 #27 (((home[Title/Abstract]) OR water[Title/Abstract]) OR spa[Title/Abstract]) OR group[Title/Abstract]  
32  
33 #28 #26 AND #27  
34  
35 #29 (((((((((sport\*[Title/Abstract]) OR recreation\*[Title/Abstract]) OR walk\*[Title/Abstract]) OR swim\*[Title/Abstract]) OR  
36  
37  
38  
39  
40  
41  
42  
43  
44  
45  
46
-



---

bike\*[Title/Abstract]) OR cycl\*[Title/Abstract]) OR ergomet\*[Title/Abstract]) OR danc\*[Title/Abstract]) OR yoga[Title/Abstract])

OR tai chi [Title/Abstract]

#30 (hydrotherapy[Title/Abstract]) OR balneotherapy[Title/Abstract]

#31 #13 OR #14 OR #15 OR #16 OR #17 OR #18 OR #19 OR #21 OR #22 OR #25 OR #28 OR #29 OR #30

#32 #4 AND #12 AND # 31

---

## PRISMA-P 2015 Checklist

This checklist has been adapted for use with protocol submissions to *Systematic Reviews* from Table 3 in Moher D et al: Preferred reporting items for systematic review and meta-analysis protocols (PRISMA-P) 2015 statement. *Systematic Reviews* 2015 4:1

| Section/topic                     | #  | Checklist item                                                                                                                                                                                  | Information reported                |                                     | Line number(s) |
|-----------------------------------|----|-------------------------------------------------------------------------------------------------------------------------------------------------------------------------------------------------|-------------------------------------|-------------------------------------|----------------|
|                                   |    |                                                                                                                                                                                                 | Yes                                 | No                                  |                |
| <b>ADMINISTRATIVE INFORMATION</b> |    |                                                                                                                                                                                                 |                                     |                                     |                |
| <b>Title</b>                      |    |                                                                                                                                                                                                 |                                     |                                     |                |
| Identification                    | 1a | Identify the report as a protocol of a systematic review                                                                                                                                        | <input checked="" type="checkbox"/> | <input type="checkbox"/>            | 1-2            |
| Update                            | 1b | If the protocol is for an update of a previous systematic review, identify as such                                                                                                              | <input type="checkbox"/>            | <input checked="" type="checkbox"/> |                |
| <b>Registration</b>               | 2  | If registered, provide the name of the registry (e.g., PROSPERO) and registration number in the Abstract                                                                                        | <input checked="" type="checkbox"/> | <input type="checkbox"/>            | 49             |
| <b>Authors</b>                    |    |                                                                                                                                                                                                 |                                     |                                     |                |
| Contact                           | 3a | Provide name, institutional affiliation, and e-mail address of all protocol authors; provide physical mailing address of corresponding author                                                   | <input checked="" type="checkbox"/> | <input type="checkbox"/>            | 6-17           |
| Contributions                     | 3b | Describe contributions of protocol authors and identify the guarantor of the review                                                                                                             | <input checked="" type="checkbox"/> | <input type="checkbox"/>            | 253-256        |
| <b>Amendments</b>                 | 4  | If the protocol represents an amendment of a previously completed or published protocol, identify as such and list changes; otherwise, state plan for documenting important protocol amendments | <input type="checkbox"/>            | <input checked="" type="checkbox"/> |                |
| <b>Support</b>                    |    |                                                                                                                                                                                                 |                                     |                                     |                |
| Sources                           | 5a | Indicate sources of financial or other support for the review                                                                                                                                   | <input checked="" type="checkbox"/> | <input type="checkbox"/>            | 257-260        |
| Sponsor                           | 5b | Provide name for the review funder and/or sponsor                                                                                                                                               | <input checked="" type="checkbox"/> | <input type="checkbox"/>            | 257-260        |
| Role of sponsor/funder            | 5c | Describe roles of funder(s), sponsor(s), and/or institution(s), if any, in developing the protocol                                                                                              | <input checked="" type="checkbox"/> | <input type="checkbox"/>            | 257-260        |
| <b>INTRODUCTION</b>               |    |                                                                                                                                                                                                 |                                     |                                     |                |
| <b>Rationale</b>                  | 6  | Describe the rationale for the review in the context of what is already known                                                                                                                   | <input checked="" type="checkbox"/> | <input type="checkbox"/>            | 62-86          |
| <b>Objectives</b>                 | 7  | Provide an explicit statement of the question(s) the review will address with reference to participants, interventions, comparators, and outcomes (PICO)                                        | <input checked="" type="checkbox"/> | <input type="checkbox"/>            | 87-89          |
| <b>METHODS</b>                    |    |                                                                                                                                                                                                 |                                     |                                     |                |

| Section/topic                             | #   | Checklist item                                                                                                                                                                                                                              | Information reported                |                                     | Line number(s) |
|-------------------------------------------|-----|---------------------------------------------------------------------------------------------------------------------------------------------------------------------------------------------------------------------------------------------|-------------------------------------|-------------------------------------|----------------|
|                                           |     |                                                                                                                                                                                                                                             | Yes                                 | No                                  |                |
| <b>Eligibility criteria</b>               | 8   | Specify the study characteristics (e.g., PICO, study design, setting, time frame) and report characteristics (e.g., years considered, language, publication status) to be used as criteria for eligibility for the review                   | <input checked="" type="checkbox"/> | <input type="checkbox"/>            | 102-124        |
| <b>Information sources</b>                | 9   | Describe all intended information sources (e.g., electronic databases, contact with study authors, trial registers, or other grey literature sources) with planned dates of coverage                                                        | <input checked="" type="checkbox"/> | <input type="checkbox"/>            | 145-154        |
| <b>Search strategy</b>                    | 10  | Present draft of search strategy to be used for at least one electronic database, including planned limits, such that it could be repeated                                                                                                  | <input checked="" type="checkbox"/> | <input type="checkbox"/>            | 145-154        |
| <b>STUDY RECORDS</b>                      |     |                                                                                                                                                                                                                                             |                                     |                                     |                |
| <b>Data management</b>                    | 11a | Describe the mechanism(s) that will be used to manage records and data throughout the review                                                                                                                                                | <input type="checkbox"/>            | <input checked="" type="checkbox"/> |                |
| <b>Selection process</b>                  | 11b | State the process that will be used for selecting studies (e.g., two independent reviewers) through each phase of the review (i.e., screening, eligibility, and inclusion in meta-analysis)                                                 | <input checked="" type="checkbox"/> | <input type="checkbox"/>            | 157-162        |
| <b>Data collection process</b>            | 11c | Describe planned method of extracting data from reports (e.g., piloting forms, done independently, in duplicate), any processes for obtaining and confirming data from investigators                                                        | <input checked="" type="checkbox"/> | <input type="checkbox"/>            | 165-175        |
| <b>Data items</b>                         | 12  | List and define all variables for which data will be sought (e.g., PICO items, funding sources), any pre-planned data assumptions and simplifications                                                                                       | <input checked="" type="checkbox"/> | <input type="checkbox"/>            | 165-175        |
| <b>Outcomes and prioritization</b>        | 13  | List and define all outcomes for which data will be sought, including prioritization of main and additional outcomes, with rationale                                                                                                        | <input checked="" type="checkbox"/> | <input type="checkbox"/>            | 165-175        |
| <b>Risk of bias in individual studies</b> | 14  | Describe anticipated methods for assessing risk of bias of individual studies, including whether this will be done at the outcome or study level, or both; state how this information will be used in data synthesis                        | <input checked="" type="checkbox"/> | <input type="checkbox"/>            | 178-185        |
| <b>DATA</b>                               |     |                                                                                                                                                                                                                                             |                                     |                                     |                |
| <b>Synthesis</b>                          | 15a | Describe criteria under which study data will be quantitatively synthesized                                                                                                                                                                 | <input checked="" type="checkbox"/> | <input type="checkbox"/>            | 188-207        |
|                                           | 15b | If data are appropriate for quantitative synthesis, describe planned summary measures, methods of handling data, and methods of combining data from studies, including any planned exploration of consistency (e.g., $I^2$ , Kendall's tau) | <input checked="" type="checkbox"/> | <input type="checkbox"/>            | 188-219        |
|                                           | 15c | Describe any proposed additional analyses (e.g., sensitivity or subgroup analyses, meta-regression)                                                                                                                                         | <input checked="" type="checkbox"/> | <input type="checkbox"/>            | 220-226        |
|                                           | 15d | If quantitative synthesis is not appropriate, describe the type of summary planned                                                                                                                                                          | <input type="checkbox"/>            | <input checked="" type="checkbox"/> |                |
| <b>Meta-bias(es)</b>                      | 16  | Specify any planned assessment of meta-bias(es) (e.g., publication bias across studies, selective reporting within studies)                                                                                                                 | <input checked="" type="checkbox"/> | <input type="checkbox"/>            | 227-231        |
| <b>Confidence in cumulative evidence</b>  | 17  | Describe how the strength of the body of evidence will be assessed (e.g., GRADE)                                                                                                                                                            | <input checked="" type="checkbox"/> | <input type="checkbox"/>            | 234-242        |

# BMJ Open

## Exercise interventions for ankylosing spondylitis: A protocol for a Bayesian network meta-analysis

|                                 |                                                                                                                                                                                                                                                                                                                                                                                                                                                                          |
|---------------------------------|--------------------------------------------------------------------------------------------------------------------------------------------------------------------------------------------------------------------------------------------------------------------------------------------------------------------------------------------------------------------------------------------------------------------------------------------------------------------------|
| Journal:                        | <i>BMJ Open</i>                                                                                                                                                                                                                                                                                                                                                                                                                                                          |
| Manuscript ID                   | bmjopen-2019-029991.R1                                                                                                                                                                                                                                                                                                                                                                                                                                                   |
| Article Type:                   | Protocol                                                                                                                                                                                                                                                                                                                                                                                                                                                                 |
| Date Submitted by the Author:   | 16-Apr-2019                                                                                                                                                                                                                                                                                                                                                                                                                                                              |
| Complete List of Authors:       | Kan, Shun-Li; Tianjin Union Medical Center, Department of Spine Surgery<br>Chen, Lingxiao; University of Sydney, Institute of Bone and Joint Research, The Kolling institute, Sydney Medical School<br>Yuan, Zhi-Fang; Tianjin Medical University General Hospital, Department of Respiratory and Critical Care Medicine<br>Hu, Wei; Tianjin Union Medical Center, Department of Spine Surgery<br>Zhu, Ru-Sen; Tianjin Union Medical Center, Department of Spine Surgery |
| <b>Primary Subject Heading</b>: | Sports and exercise medicine                                                                                                                                                                                                                                                                                                                                                                                                                                             |
| Secondary Subject Heading:      | Rheumatology                                                                                                                                                                                                                                                                                                                                                                                                                                                             |
| Keywords:                       | exercise, ankylosing spondylitis, network meta-analysis, Bayesian                                                                                                                                                                                                                                                                                                                                                                                                        |
|                                 |                                                                                                                                                                                                                                                                                                                                                                                                                                                                          |

SCHOLARONE™  
Manuscripts

1  
2  
3  
4 **1 Exercise interventions for ankylosing spondylitis: A protocol for a Bayesian**  
5 **2 network meta-analysis**  
6  
7  
8  
9

10 4 Shun-Li Kan<sup>1</sup>, Ling-Xiao Chen<sup>2</sup>, Zhi-Fang Yuan<sup>3</sup>, Wei Hu<sup>1</sup>, Ru-Sen Zhu<sup>1</sup>  
11  
12

13 6 <sup>1</sup>Department of Spine Surgery, Tianjin Union Medical Center, 190 Jieyuan Road,  
14 Hongqiao District, Tianjin, China  
15  
16

17 8 <sup>2</sup>Institute of Bone and Joint Research, The Kolling institute, Sydney Medical School,  
18 The University of Sydney  
19  
20

21 10 <sup>3</sup>Department of Respiratory and Critical Care Medicine, Tianjin Medical University  
22 General Hospital, 154 Anshan Road, Heping District, Tianjin, China  
23  
24  
25

26  
27 13 S-LK and L-XC contributed equally to this work.  
28  
29

30  
31 15 Correspondence to  
32

33 16 Dr Ru-Sen Zhu;  
34

35 17 rszhuspine@163.com  
36  
37  
38  
39  
40  
41  
42  
43  
44  
45  
46  
47  
48  
49  
50  
51  
52  
53  
54  
55  
56  
57  
58  
59  
60

## 31 **ABSTRACT**

32 **Introduction:** Ankylosing spondylitis (AS) is a universal chronic inflammatory  
33 rheumatic disease which predominantly results in chronic back pain and stiffness.  
34 However, some patients suffering from AS do not react well to pharmacological  
35 interventions. Exercise intervention has been employed for the treatment of AS and  
36 works as a complementary part of the management of AS. However, the effect of  
37 different types of exercise interventions remain unclear. The purpose of this study is to  
38 determine the relative efficacy of different types of exercise interventions for  
39 individuals with AS using a Bayesian network meta-analysis.

40 **Methods and analysis:** We will conduct a systematic literature review of randomized  
41 controlled trials that compare different types of exercise interventions for individuals  
42 with AS. The primary outcomes are functional capacity, pain, and disease activity. The  
43 risk of bias for individual studies will be evaluated according to the Cochrane  
44 Handbook. A Bayesian network meta-analysis will be performed to compare the  
45 efficacy of different types of exercise interventions. The quality of evidence will be  
46 assessed by the Grading of Recommendations, Assessment, Development and  
47 Evaluation (GRADE) approach.

48 **Ethics and dissemination:** Ethical approval and patient consent are not required since  
49 this study is a meta-analysis based on published studies. The results of this network  
50 meta-analysis will be submitted to a peer-reviewed journal for publication.

51 **Protocol registration number:** PROSPERO CRD42019123099.

### 52 **Strengths and limitations of this study**

- 53 ■ This is the most comprehensive review comparing the efficacy of different types  
54 of exercise interventions for individuals with AS through a Bayesian network meta-  
55 analysis.
- 56 ■ The main strength is that only randomized controlled trials will be included.
- 57 ■ We will use the Grading of Recommendations Assessment, Development and  
58 Evaluation (GRADE) approach to evaluate the quality of evidence.

59  
60

## 61 INTRODUCTION

62 Ankylosing spondylitis (AS) is a universal chronic inflammatory rheumatic disease  
63 which predominantly influences the axial skeleton (e.g., spine, hips and shoulders).<sup>1 2</sup>  
64 AS is characterized by inflammatory back pain which is caused by sacroiliitis and  
65 spondylitis.<sup>1</sup> Inflammatory back pain may happen in 70% to 80% of patients with AS.  
66 AS commonly starts early and about 10% to 20% of patients with AS commence to  
67 develop the first symptoms before 16 years of age.<sup>3 4</sup> It has reported that estimates for  
68 the prevalence of AS vary from 0.01% to 1.8%.<sup>5</sup> Patients with AS often experience  
69 chronic back pain, stiffness, arthritis and enthesitis, which seriously affect patients'  
70 health and quality of life, disturb their recreational activities, work, family life and  
71 relationships, and result in considerable psychological distress and fears.

72 Non-steroidal anti-inflammatory drugs (NSAIDs), including COX-2 inhibitors,  
73 are recommended as the first-line drug intervention for reducing pain and stiffness.  
74 Biological disease modifying antirheumatic drugs have also proved effective for the  
75 manage inhibitors, the anti-interleukin-17 inhibitor, and so on.<sup>6</sup> However, some patients  
76 suffering from AS do not react well to pharmacological interventions.<sup>7</sup> Exercise is  
77 recommended by several guidelines as a co-intervention in combination with  
78 pharmacological interventions to treat patients with AS.<sup>2 8</sup> Previous systematic  
79 reviews<sup>9-11</sup> demonstrated that exercises have significant positive effects on pain, spinal  
80 mobility, and physical function. However, they did not classify different types of  
81 exercise, such as group exercise, individualized exercise, supervised exercise, home-  
82 based exercise, and so on. Therefore, we do not know which is the best one. When no  
83 studies exist that directly compare all relevant treatment choices, a network meta-  
84 analysis can be performed by comparing the relative effects of treatments against a  
85 common comparator or combining a variety of comparisons that are taken together  
86 from one or more chains linking the treatments of interest.<sup>12</sup>

87 Therefore, the purpose of this study is to comprehensively review the literature and  
88 determine the relative efficacy of different types of exercise interventions for  
89 individuals with AS using a Bayesian network meta-analysis.

90

## 91 **METHODS**

### 92 **Design**

93 A network meta-analysis using a Bayesian framework will be implemented in this study.  
94 This protocol of network meta-analysis will be performed on the basis of the Preferred  
95 Reporting Items for Systematic review and Meta-Analysis Protocol (PRISMA-P),<sup>13</sup> and  
96 the reporting of the following network meta-analysis will obey the PRISMA extension  
97 statement for reporting of systematic reviews incorporating network meta-analysis of  
98 health care interventions.<sup>14</sup> This study has been registered at PROSPERO  
99 (<http://www.crd.york.ac.uk/PROSPERO>) with registration number CRD42019123099.

100

### 101 **Eligibility criteria**

#### 102 1. Type of study

103 We will include randomized controlled trials comparing different exercise interventions,  
104 and/or comparing a specific exercise intervention with no treatment, standard care or  
105 usual physical activity. For cross-over studies, we only use the data before wash-out  
106 period. We will not restrain the language or date of publication. We will divide the trial  
107 duration into short-term follow-up (6 months) and long-term follow-up (12 months). If  
108 the trial duration is closer to 6 months or 12 months, we will classify the trial duration  
109 as short-term follow-up or long-term follow-up.

#### 110 2. Participants

111 Trials enrolling adults, aged at least 18 years, with a diagnosis of AS according to the  
112 Modified New York criteria<sup>15</sup> or the Amor criteria<sup>16</sup> or radiographic axial  
113 spondyloarthritis (SpA) according to the criteria for axial SpA defined by the  
114 Assessment of Spondyloarthritis International Society (ASAS)<sup>17</sup> will be included.

115 We will exclude studies involving participants with non-radiographic axial SpA  
116 according to the criteria for axial SpA defined by the ASAS.

#### 117 3. Type of interventions

118 Any type of exercise interventions will be included. Exercise intervention is defined as  
119 a type of physical activity that is planned, structured and repeated over a period of  
120 time.<sup>18</sup>



1  
2  
3  
4 121 Trials that compare an exercise intervention combined with a co-intervention  
5  
6 122 versus the co-intervention alone or the exercise intervention alone (e.g., an exercise  
7  
8 123 intervention plus anti-TNF $\alpha$  therapy versus anti-TNF $\alpha$  therapy alone, an exercise  
9  
10 124 intervention plus spa therapy versus the exercise intervention) will be considered.

11  
12 125 Trails investigating exercise interventions with different setting (home, hospital, or  
13  
14 126 elsewhere) or different delivery method (individual, group, supervision, or mixed) will  
15  
16 127 be included.

17  
18 128 Trials comparing an exercise intervention with no treatment, standard care or usual  
19  
20 129 physical activity will be considered.

#### 21 130 4. Outcomes of interest

##### 22 23 131 4.1 Primary outcomes

24  
25 132 The Bath Ankylosing Spondylitis Functional Index (BASFI)<sup>19</sup> is 10 item index that  
26  
27 133 evaluate the functional capacity in performing daily activities of patients with AS.  
28  
29 134 Higher score of the BASFI reflects greater impairment in functional capacity.

30  
31 135 Pain will be measured based on a visual analogue scale (VAS) or numerical rating  
32  
33 136 scale (NRS). We will record data on back pain at night, total back pain, overall pain at  
34  
35 137 night, or overall pain. We will collect the highest pain score from the mentioned  
36  
37 138 alternatives. And the highest pain score on numeric value will be regarded as the final  
38  
39 139 pain score.

40  
41 140 The Bath Ankylosing Spondylitis Disease Activity Index (BASDAI)<sup>20</sup> is the gold  
42  
43 141 standard for measuring and evaluating disease activity in AS. Higher score of the  
44  
45 142 BASDAI indicates greater disease activity.

##### 46 47 143 4.2 Secondary outcomes

48  
49 144 The Medical Outcomes Study 36-Item Short-Form General Health Survey (SF-36) will  
50  
51 145 be used to evaluate the quality of life, with higher scores indicating better quality of  
52  
53 146 life.

54  
55 147 The Bath Ankylosing Spondylitis Metrology Index (BASMI)<sup>21</sup> is the most widely  
56  
57 148 reported, validated objective axial mobility measure, which consists of five steps:  
58  
59 149 cervical rotation, tragus to wall distance, lumbar side flexion, modified Schober's test  
60  
150 and intermalleolar distance. High scores mean severer limitation of movement.

1  
2  
3  
4 1515 152 **Data sources and search strategy**

6  
7 153 We will systematically search PubMed, EMBASE and the Cochrane Library for  
8  
9 154 primary studies up to February 2019. The search strategy will combine free text words  
10  
11 155 and medical subject headings regarding exercise, spondyloarthritis and randomized  
12  
13 156 controlled trials. The detail of the search strategy for PubMed is shown in online  
14  
15 157 supplementary file S1. This search strategy will be modified as required for other  
16  
17 158 databases. Furthermore, we will also retrieve the World Health Organization (WHO)  
18  
19 159 International Clinical Trials Registry Platform and ClinicalTrials.gov to identify  
20  
21 160 ongoing trial registers. We will examine bibliographies of pertinent systematic reviews  
22  
23 161 and meta-analyses for additional related studies. We will not limit language of  
24  
25 162 publication or publication period.

26  
27 16328  
29 164 **Study selection**

30  
31 165 Two reviewers will independently check the titles and abstracts through the initial  
32  
33 166 retrieval. Publications not fulfilling the eligibility criteria will be eliminated. After  
34  
35 167 excluding the irrelevant publications, we will examine the full text of the remaining  
36  
37 168 publications based on the same eligibility criteria. Any discrepancies will be settled by  
38  
39 169 discussion and consensus. Excluded publications and the reasons for exclusion will be  
40  
41 170 reported and confirmed by a third investigator.

42  
43 17144  
45 172 **Data extraction**

46  
47 173 Data from included publications will be independently extracted by two reviewers using  
48  
49 174 a standardized data abstraction list. The following characteristic information will be  
50  
51 175 extracted: study characteristics (first author, publication year, study year, number of  
52  
53 176 centers, country and sponsor), patient characteristics (sample size, mean age, gender  
54  
55 177 ratio, the stage of the disease, and inclusion/exclusion criteria), intervention details for  
56  
57 178 each treatment group (e.g., number of intervention groups, exercise modality and the  
58  
59 179 detailed description, frequency and duration of the intervention, the duration of follow-  
60  
180 up, and co-interventions) and outcome measures (BASFI, BASDAI, BASMI, pain, and

1  
2  
3  
4 181 SF-36). We will prioritize the data at the end of the studies compared with the changes  
5  
6 182 from baseline in all the outcomes. Numerical data will be extracted to calculate pooled  
7  
8 183 estimations. If the study only reports SE, p value or CI, we will convert them into SD.<sup>22</sup>  
9  
10 184 If the study reports median and IQR, we will calculate SD by dividing the IQR by 1.35  
11  
12 185 and considering the median equivalent to the mean.<sup>22</sup> If the data are not reported in the  
13  
14 186 texts directly, we will infer them from the associated graphs. If data cannot be obtained,  
15  
16 187 we will contact the corresponding authors. Any disagreements will be settled by  
17  
18 188 discussion and consensus.

19 189

### 20 21 22 **Risk of bias assessment**

23 191 The Cochrane Risk of Bias Tool will be used to appraise the risk of bias for individual  
24  
25 192 studies.<sup>23</sup> Each study will be evaluated and scored as high, low, or unclear risk of bias  
26  
27 193 based on the following criteria: randomization, allocation concealment, blinding of  
28  
29 194 participants and personnel, blinding of outcome assessors, incomplete outcome data,  
30  
31 195 selective reporting and other biases. A study with a high risk of bias in one or more  
32  
33 196 domains will be viewed as high risk of bias. A study with a low risk of bias in all  
34  
35 197 domains will be considered as low risk of bias. If not, a study will be treated as unclear  
36  
37 198 risk of bias. Any disagreements were resolved by discussion and consensus.

38  
39 199

### 40 41 42 **Statistical analysis**

43 201 A traditional pairwise meta-analysis will be done when at least two studies exist for an  
44  
45 202 outcome. A random-effects model with the Hartung-Knapp-Sidik-Jonkstra method<sup>24</sup>  
46  
47 203 will be used to estimate the effect size and 95% confidence interval (CI) accounting for  
48  
49 204 methodological and clinical heterogeneity across studies, with Stata, version 13.0 (Stata  
50  
51 205 Corp, College Station, TX).<sup>25</sup> We will use mean difference (MD) for a certain outcome  
52  
53 206 when more than 50 percent studies reporting the outcome use the same measurement.  
54  
55 207 Otherwise, standardized mean difference (SMD) will be used. The extent of between-  
56  
57 208 trial heterogeneity will be assessed with I<sup>2</sup> statistic, with values over 50% indicating  
58  
59 209 considerable heterogeneity.<sup>26</sup>

60 210 We will perform network meta-analyses to merge direct and indirect comparisons.

1  
2  
3  
4 211 All network meta-analyses will be conducted using a Bayesian Markov chain Monte  
5  
6 212 Carlo (MCMC) framework in R version 3.2.5 software ([https://cran.r-](https://cran.r-project.org/src/base/R-3/)  
7  
8 213 [project.org/src/base/R-3/](https://cran.r-project.org/src/base/R-3/)) via the gemtc version 0.8-2 package. MD and 95% credible  
9  
10 214 interval (CrI) will be used as summary statistics to quantify the effect of different  
11  
12 215 exercise interventions. Random-effects and consistency models will be adopted in this  
13  
14 216 network meta-analysis, as they are considered to be the most conservative approach to  
15  
16 217 dealing with between-study heterogeneity.<sup>27</sup> To generate posterior distributions of  
17  
18 218 model parameters, 150 000 iterations of MCMC after 50 000 tuning iterations in three  
19  
20 219 chains will be run.<sup>28</sup> Convergence of iterations will be examined with the Gelman-  
21  
22 220 Rubin-Brooks diagnostic plots.<sup>29</sup> For any specific outcome, we will rank the probability  
23  
24 221 of each intervention being the best (superior to all other interventions), second best,  
25  
26 222 third best, etc.

27 223 The posterior mean residual deviance, an absolute measure of fit, will be computed.  
28  
29 224 The value of posterior mean residual deviance and the number of independent data  
30  
31 225 points will be assessed to check if the model fits the data satisfactorily.<sup>30</sup> To appraise  
32  
33 226 the consistency, we will use the following methods. Firstly, the model fit from the  
34  
35 227 consistency model will be compared with that from the inconsistency model.<sup>31</sup>  
36  
37 228 Secondly, network meta-analysis results (indirect evidence using the node-split  
38  
39 229 approach) will be compared with pairwise meta-analysis results (direct evidence in a  
40  
41 230 frequentist framework).<sup>32</sup>

42 231 Clinical and methodological heterogeneity will be evaluated by checking the  
43  
44 232 characteristics and design of the included studies. Statistical heterogeneity in the  
45  
46 233 network will be assessed according to the heterogeneity parameter ( $I^2$  or  $\tau^2$ ) derived  
47  
48 234 from the network meta-analysis.  $I^2$  more than 50% indicates substantial heterogeneity.  
49  
50 235 Heterogeneity will be explored by fitting covariates (ie, mean age, sample size, the  
51  
52 236 duration of symptoms, the dose of exercise (frequency  $\times$  duration intensity), and the  
53  
54 237 duration of follow-up) in network meta-regression analyses.<sup>33</sup> Subgroup analyses will  
55  
56 238 be further conducted ground on the duration of symptoms (early or long-term disease)  
57  
58 239 and concomitant pharmacological treatment (anti-TNF agents, NSAIDs, or other  
59  
60 240 pharmacological interventions), if possible. Sensitivity analyses will be executed to test

1  
2  
3  
4 241 the robustness of outcomes by limiting analyses to studies with low risk of bias.

5 242 To examine the potential of small-study effects in the network, comparison-  
6  
7 243 adjusted funnel plots will be produced.<sup>34</sup> For the comparison-adjusted funnel plot, the  
8  
9 244 horizontal axis will represent the difference between study-specific effect sizes and the  
10  
11 245 comparison-specific summary effect. In the absence of small-study effects, the  
12  
13 246 comparison-adjusted funnel plot should be symmetric around the zero line.  
14

15 247

### 17 248 **Quality of evidence**

19 249 We will follow the Grading of Recommendations, Assessment, Development and  
20  
21 250 Evaluation (GRADE) four-step approach to grade the quality of treatment effect  
22  
23 251 estimations from network meta-analysis.<sup>35</sup> Firstly, present direct and indirect treatment  
24  
25 252 estimates for each comparison of the evidence network. Secondly, rate the quality of  
26  
27 253 each direct and indirect effect estimate. Then, present the network meta-analysis  
28  
29 254 estimate for each comparison of the evidence network. At last, rate the quality of each  
30  
31 255 network meta-analysis effect estimate. According to risk of bias, inconsistency,  
32  
33 256 indirectness, imprecision and publication bias, the quality of evidence will be graded as  
34  
35 257 high, moderate, low, or very low.  
36

37 258

### 39 259 **Patient and Public Involvement**

40 260 Patients or public will not be involved.  
41

42 261

## 44 262 **ETHICS AND DISSEMINATION**

### 46 263 **Ethical issues**

48 264 As no primary data collection will be undertaken, no additional formal ethical  
49  
50 265 assessment and no informed consent are required.  
51

52 266

### 54 267 **Publication plan**

56 268 This network meta-analysis will be submitted to a peer-reviewed journal. It will be  
57  
58 269 disseminated electronically and in print.  
59

60 270

1  
2  
3  
4 271 **Contributors** S-LK, L-XC, Z-FY and R-SZ participated in the conception and design  
5  
6 272 of the study, including search strategy development. S-LK, L-XC, Z-FY and WH tested  
7  
8 273 the feasibility of the study. S-LK wrote the manuscript. All the authors critically  
9  
10 274 reviewed this manuscript and approved the final version.

11  
12 275

13 276 **Funding** This work was supported by Tianjin Municipal Science and Technology  
14  
15 277 Commission (16KG158), and Foundation of Tianjin Union Medical Center  
16  
17 278 (2018YJ010). The funders had no role in study design, data collection and analysis,  
18  
19 279 decision to publish, or preparation of the manuscript.

20  
21 280

22  
23 281 **Competing interests** None declared.

24  
25 282

26  
27 283 **Patient consent for publication** Not required.

28  
29 284

30  
31 285 **Provenance and peer review** Not commissioned; externally peer reviewed.

32  
33 286

## 34 287 **REFERENCES**

- 35  
36 288 1. Baraliakos X, Haibel H, Listing J, et al. Continuous long-term anti-TNF therapy does not lead to an  
37  
38 289 increase in the rate of new bone formation over 8 years in patients with ankylosing spondylitis.  
39  
40 290 *Ann Rheum Dis* 2014;73(4):710-5. doi: 10.1136/annrheumdis-2012-202698 [published Online  
41  
42 291 First: 2013/03/19]
- 43 292 2. van der Heijde D, Ramiro S, Landewe R, et al. 2016 update of the ASAS-EULAR management  
44  
45 293 recommendations for axial spondyloarthritis. *Ann Rheum Dis* 2017;76(6):978-91. doi:  
46  
47 294 10.1136/annrheumdis-2016-210770 [published Online First: 2017/01/15]
- 48 295 3. Colbert RA. Classification of juvenile spondyloarthritis: Enthesitis-related arthritis and beyond.  
49  
50 296 *Nature reviews Rheumatology* 2010;6(8):477-85. doi: 10.1038/nrrheum.2010.103 [published  
51  
52 297 Online First: 2010/07/08]
- 53 298 4. Ramanathan A, Srinivasalu H, Colbert RA. Update on juvenile spondyloarthritis. *Rheumatic diseases*  
54  
55 299 *clinics of North America* 2013;39(4):767-88. doi: 10.1016/j.rdc.2013.06.002 [published Online  
56  
57 300 First: 2013/11/05]
- 58 301 5. van Tubergen A. The changing clinical picture and epidemiology of spondyloarthritis. *Nature reviews*  
59  
60 302 *Rheumatology* 2015;11(2):110-8. doi: 10.1038/nrrheum.2014.181 [published Online First:  
303  
304 2014/11/12]
- 305 304 6. Taurog JD, Chhabra A, Colbert RA. Ankylosing Spondylitis and Axial Spondyloarthritis. *The New*  
306  
307 *England journal of medicine* 2016;374(26):2563-74. doi: 10.1056/NEJMra1406182 [published  
Online First: 2016/06/30]

- 1  
2  
3 307 7. Sieper J, Braun J, Dougados M, et al. Axial spondyloarthritis. *Nature reviews Disease primers*  
4 308 2015;1:15013. doi: 10.1038/nrdp.2015.13 [published Online First: 2015/01/01]
- 5  
6 309 8. Ward MM, Deodhar A, Akl EA, et al. American College of Rheumatology/Spondylitis Association of  
7 310 America/Spondyloarthritis Research and Treatment Network 2015 Recommendations for the  
8 311 Treatment of Ankylosing Spondylitis and Nonradiographic Axial Spondyloarthritis. *Arthritis &*  
9 312 *rheumatology (Hoboken, NJ)* 2016;68(2):282-98. doi: 10.1002/art.39298 [published Online  
10 313 First: 2015/09/25]
- 11  
12 314 9. Dagfinrud H, Kvien TK, Hagen KB. Physiotherapy interventions for ankylosing spondylitis. *The*  
13 315 *Cochrane database of systematic reviews* 2008;(1):Cd002822. doi:  
14 316 10.1002/14651858.CD002822.pub3 [published Online First: 2008/02/07]
- 15  
16 317 10. Martins NA, Furtado GE, Campos MJ, et al. Exercise and ankylosing spondylitis with New York  
17 318 modified criteria: a systematic review of controlled trials with meta-analysis. *Acta*  
18 319 *reumatologica portuguesa* 2014;39(4):298-308. [published Online First: 2014/10/30]
- 19  
20 320 11. Pecourneau V, Degboe Y, Barnetche T, et al. Effectiveness of Exercise Programs in Ankylosing  
21 321 Spondylitis: A Meta-Analysis of Randomized Controlled Trials. *Archives of physical medicine*  
22 322 *and rehabilitation* 2018;99(2):383-89.e1. doi: 10.1016/j.apmr.2017.07.015 [published  
23 323 Online First: 2017/09/02]
- 24  
25 324 12. Lu G, Ades AE. Combination of direct and indirect evidence in mixed treatment comparisons.  
26 325 *Statistics in medicine* 2004;23(20):3105-24. doi: 10.1002/sim.1875 [published Online First:  
27 326 2004/09/28]
- 28  
29 327 13. Moher D, Shamseer L, Clarke M, et al. Preferred reporting items for systematic review and meta-  
30 328 analysis protocols (PRISMA-P) 2015 statement. *Systematic reviews* 2015;4:1. doi:  
31 329 10.1186/2046-4053-4-1 [published Online First: 2015/01/03]
- 32  
33 330 14. Hutton B, Salanti G, Caldwell DM, et al. The PRISMA extension statement for reporting of systematic  
34 331 reviews incorporating network meta-analyses of health care interventions: checklist and  
35 332 explanations. *Ann Intern Med* 2015;162(11):777-84. doi: 10.7326/m14-2385 [published Online  
36 333 First: 2015/06/02]
- 37  
38 334 15. van der Linden S, Valkenburg HA, Cats A. Evaluation of diagnostic criteria for ankylosing spondylitis.  
39 335 A proposal for modification of the New York criteria. *Arthritis Rheum* 1984;27(4):361-8.  
40 336 [published Online First: 1984/04/01]
- 41  
42 337 16. Amor B, Dougados M, Mijiyawa M. Criteria of the classification of spondylarthropathies. *Revue du*  
43 338 *rhumatisme et des maladies osteo-articulaires* 1990;57(2):85-9. [published Online First:  
44 339 1990/02/01]
- 45  
46 340 17. Rudwaleit M, van der Heijde D, Landewe R, et al. The development of Assessment of  
47 341 SpondyloArthritis international Society classification criteria for axial spondyloarthritis (part  
48 342 II): validation and final selection. *Ann Rheum Dis* 2009;68(6):777-83. doi:  
49 343 10.1136/ard.2009.108233 [published Online First: 2009/03/20]
- 50  
51 344 18. Bouchard C, Blair S, Haskell W. Physical Activity and Health. Human Kinetics, Inc, 2007.
- 52  
53 345 19. Calin A, Garrett S, Whitelock H, et al. A new approach to defining functional ability in ankylosing  
54 346 spondylitis: the development of the Bath Ankylosing Spondylitis Functional Index. *The Journal*  
55 347 *of rheumatology* 1994;21(12):2281-5. [published Online First: 1994/12/01]
- 56  
57 348 20. Garrett S, Jenkinson T, Kennedy LG, et al. A new approach to defining disease status in ankylosing  
58 349 spondylitis: the Bath Ankylosing Spondylitis Disease Activity Index. *The Journal of*  
59 350 *rheumatology* 1994;21(12):2286-91. [published Online First: 1994/12/01]
- 60

- 1  
2  
3 351 21. Jenkinson TR, Mallorie PA, Whitelock HC, et al. Defining spinal mobility in ankylosing spondylitis (AS).  
4 352 The Bath AS Metrology Index. *The Journal of rheumatology* 1994;21(9):1694-8. [published  
5 353 Online First: 1994/09/01]  
6  
7 354 22. Higgins JPT, Green S (editors). Cochrane Handbook for Systematic Reviews of Interventions Version  
8 355 5.1.0 [updated March 2011]. The Cochrane Collaboration, 2011. Available from  
9 356 [www.cochrane-handbook.org](http://www.cochrane-handbook.org).  
10  
11 357 23. Higgins JP, Altman DG, Gotzsche PC, et al. The Cochrane Collaboration's tool for assessing risk of  
12 358 bias in randomised trials. *Bmj* 2011;343:d5928. doi: 10.1136/bmj.d5928 [published Online  
13 359 First: 2011/10/20]  
14  
15 360 24. Veroniki AA, Jackson D, Viechtbauer W, et al. Recommendations for quantifying the uncertainty in  
16 361 the summary intervention effect and estimating the between-study heterogeneity variance in  
17 362 random-effects meta-analysis. *The Cochrane database of systematic reviews* 2015(Suppl 1):25-  
18 363 27.  
19  
20 364 25. DerSimonian R, Laird N. Meta-analysis in clinical trials. *Controlled clinical trials* 1986;7(3):177-88.  
21 365 [published Online First: 1986/09/01]  
22  
23 366 26. Higgins JP, Thompson SG, Deeks JJ, et al. Measuring inconsistency in meta-analyses. *Bmj*  
24 367 2003;327(7414):557-60. doi: 10.1136/bmj.327.7414.557 [published Online First: 2003/09/06]  
25 368 27. Mills EJ, Thorlund K, Ioannidis JP. Demystifying trial networks and network meta-analysis. *Bmj*  
26 369 2013;346:f2914. doi: 10.1136/bmj.f2914 [published Online First: 2013/05/16]  
27  
28 370 28. Toft N, Innocent GT, Gettinby G, et al. Assessing the convergence of Markov Chain Monte Carlo  
29 371 methods: an example from evaluation of diagnostic tests in absence of a gold standard.  
30 372 *Preventive veterinary medicine* 2007;79(2-4):244-56. doi: 10.1016/j.prevetmed.2007.01.003  
31 373 [published Online First: 2007/02/13]  
32  
33 374 29. Gelman A, Rubin DB. Markov chain Monte Carlo methods in biostatistics. *Statistical methods in*  
34 375 *medical research* 1996;5(4):339-55. [published Online First: 1996/12/01]  
35  
36 376 30. Dias S, Sutton AJ, Ades AE, et al. Evidence synthesis for decision making 2: a generalized linear  
37 377 modeling framework for pairwise and network meta-analysis of randomized controlled trials.  
38 378 *Medical decision making : an international journal of the Society for Medical Decision Making*  
39 379 2013;33(5):607-17. doi: 10.1177/0272989x12458724 [published Online First: 2012/10/30]  
40  
41 380 31. Dias S, Welton NJ, Sutton AJ, et al. Evidence synthesis for decision making 4: inconsistency in  
42 381 networks of evidence based on randomized controlled trials. *Medical decision making : an*  
43 382 *international journal of the Society for Medical Decision Making* 2013;33(5):641-56. doi:  
44 383 10.1177/0272989x12455847 [published Online First: 2013/06/28]  
45  
46 384 32. Dias S, Welton NJ, Caldwell DM, et al. Checking consistency in mixed treatment comparison meta-  
47 385 analysis. *Statistics in medicine* 2010;29(7-8):932-44. doi: 10.1002/sim.3767 [published Online  
48 386 First: 2010/03/10]  
49  
50 387 33. Dias S, Sutton AJ, Welton NJ, et al. Evidence synthesis for decision making 3: heterogeneity--  
51 388 subgroups, meta-regression, bias, and bias-adjustment. *Medical decision making : an*  
52 389 *international journal of the Society for Medical Decision Making* 2013;33(5):618-40. doi:  
53 390 10.1177/0272989x13485157 [published Online First: 2013/06/28]  
54  
55 391 34. Chaimani A, Higgins JP, Mavridis D, et al. Graphical tools for network meta-analysis in STATA. *PLoS*  
56 392 *One* 2013;8(10):e76654. doi: 10.1371/journal.pone.0076654 [published Online First:  
57 393 2013/10/08]  
58  
59 394 35. Puhan MA, Schunemann HJ, Murad MH, et al. A GRADE Working Group approach for rating the  
60



1  
2  
3  
4  
5  
6  
7  
8  
9  
10  
11  
12  
13  
14  
15  
16  
17  
18  
19  
20  
21  
22  
23  
24  
25  
26  
27  
28  
29  
30  
31  
32  
33  
34  
35  
36  
37  
38  
39  
40  
41  
42  
43  
44  
45  
46  
47  
48  
49  
50  
51  
52  
53  
54  
55  
56  
57  
58  
59  
60

395 quality of treatment effect estimates from network meta-analysis. *Bmj* 2014;349:g5630. doi:  
396 10.1136/bmj.g5630 [published Online First: 2014/09/26]  
397

For peer review only

**PubMed**

---

- 1  
2  
3  
4  
5  
6  
7 #1 "Randomized Controlled Trial" [Publication Type] OR "Controlled Clinical Trial" [Publication Type]  
8  
9 #2 (((((placebo[Title/Abstract]) OR randomized[Title/Abstract]) OR randomly[Title/Abstract]) OR trial[Title/Abstract]) OR  
10 groups[Title/Abstract]  
11  
12 #3 ("Animals"[Mesh]) NOT "Humans"[Mesh]  
13  
14 #4 (#1 OR #2) NOT #3  
15  
16 #5 "Spondylarthritis"[Mesh]  
17  
18 #6 "Spondylitis, Ankylosing"[Mesh]  
19  
20 #7 "Sacroiliitis"[Mesh]  
21  
22 #8 ((((((Bechterew Disease[Title/Abstract]) OR Marie-Struempell Disease[Title/Abstract]) OR Ankylosing Spondylitis[Title/Abstract])  
23 OR AS[Title/Abstract]) OR axSpA[Title/Abstract]) OR axial spondyloarthritis[Title/Abstract]  
24  
25 #9 (((axial[Title/Abstract]) OR spin\*[Title/Abstract]) OR peripheral[Title/Abstract]) OR vertebral[Title/Abstract]  
26  
27 #10 (((joint\*[Title/Abstract]) OR spondyloarthritis[Title/Abstract]) OR arthritis[Title/Abstract]) OR ankylosing[Title/Abstract]  
28  
29 #11 #9 AND #10  
30  
31 #12 #5 OR #6 OR #7 OR #8 OR #11  
32  
33 #13 "Exercise"[Mesh]  
34  
35 #14 "Exercise Therapy"[Mesh]  
36  
37  
38  
39  
40  
41  
42  
43  
44  
45  
46
-

1  
2  
3  
4  
5  
6  
7  
8  
9  
10  
11  
12  
13  
14  
15  
16  
17  
18  
19  
20  
21  
22  
23  
24  
25  
26  
27  
28  
29  
30  
31  
32  
33  
34  
35  
36  
37  
38  
39  
40  
41  
42  
43  
44  
45  
46

- 
- #15 "Exercise Movement Techniques"[Mesh]
  - #16 "Physical Therapy Modalities"[Mesh]
  - #17 "Motor Activity"[Mesh]
  - #18 "Rehabilitation"[Mesh]
  - #19 "Proprioception"[Mesh]
  - #20 (((((program\*[Title/Abstract]) OR therap\*[Title/Abstract]) OR behavior\*[Title/Abstract]) OR intervention\*[Title/Abstract]) OR train\*[Title/Abstract]) OR activit\*[Title/Abstract])
  - #21 exercise AND #20
  - #22 physical AND #20
  - #23 (((AS[Title/Abstract]) OR non drug\*[Title/Abstract]) OR non pharmacological\*[Title/Abstract]) OR complementary[Title/Abstract]
  - #24 ((management[Title/Abstract]) OR intervention\*[Title/Abstract]) OR treatment\*[Title/Abstract]
  - #25 #23 AND #24
  - #26 ((((((Train\*[Title/Abstract]) OR exercise\*[Title/Abstract]) OR therap\*[Title/Abstract]) OR fitness[Title/Abstract]) OR program\*[Title/Abstract]) OR reeducation[Title/Abstract]) OR rehab\*[Title/Abstract])
  - #27 (((home[Title/Abstract]) OR water[Title/Abstract]) OR spa[Title/Abstract]) OR group[Title/Abstract]
  - #28 #26 AND #27
  - #29 ((((((((((sport\*[Title/Abstract]) OR recreation\*[Title/Abstract]) OR walk\*[Title/Abstract]) OR swim\*[Title/Abstract]) OR
-

---

bike\*[Title/Abstract]) OR cycl\*[Title/Abstract]) OR ergomet\*[Title/Abstract]) OR danc\*[Title/Abstract]) OR yoga[Title/Abstract])

OR tai chi [Title/Abstract]

#30 (hydrotherapy[Title/Abstract]) OR balneotherapy[Title/Abstract]

#31 #13 OR #14 OR #15 OR #16 OR #17 OR #18 OR #19 OR #21 OR #22 OR #25 OR #28 OR #29 OR #30

#32 #4 AND #12 AND # 31

---

## PRISMA-P 2015 Checklist

This checklist has been adapted for use with protocol submissions to *Systematic Reviews* from Table 3 in Moher D et al: Preferred reporting items for systematic review and meta-analysis protocols (PRISMA-P) 2015 statement. *Systematic Reviews* 2015 4:1

| Section/topic                     | #  | Checklist item                                                                                                                                                                                  | Information reported                |                                     | Line number(s) |
|-----------------------------------|----|-------------------------------------------------------------------------------------------------------------------------------------------------------------------------------------------------|-------------------------------------|-------------------------------------|----------------|
|                                   |    |                                                                                                                                                                                                 | Yes                                 | No                                  |                |
| <b>ADMINISTRATIVE INFORMATION</b> |    |                                                                                                                                                                                                 |                                     |                                     |                |
| <b>Title</b>                      |    |                                                                                                                                                                                                 |                                     |                                     |                |
| Identification                    | 1a | Identify the report as a protocol of a systematic review                                                                                                                                        | <input checked="" type="checkbox"/> | <input type="checkbox"/>            | 1-2            |
| Update                            | 1b | If the protocol is for an update of a previous systematic review, identify as such                                                                                                              | <input type="checkbox"/>            | <input checked="" type="checkbox"/> |                |
| <b>Registration</b>               | 2  | If registered, provide the name of the registry (e.g., PROSPERO) and registration number in the Abstract                                                                                        | <input checked="" type="checkbox"/> | <input type="checkbox"/>            | 49             |
| <b>Authors</b>                    |    |                                                                                                                                                                                                 |                                     |                                     |                |
| Contact                           | 3a | Provide name, institutional affiliation, and e-mail address of all protocol authors; provide physical mailing address of corresponding author                                                   | <input checked="" type="checkbox"/> | <input type="checkbox"/>            | 6-17           |
| Contributions                     | 3b | Describe contributions of protocol authors and identify the guarantor of the review                                                                                                             | <input checked="" type="checkbox"/> | <input type="checkbox"/>            | 253-256        |
| <b>Amendments</b>                 | 4  | If the protocol represents an amendment of a previously completed or published protocol, identify as such and list changes; otherwise, state plan for documenting important protocol amendments | <input type="checkbox"/>            | <input checked="" type="checkbox"/> |                |
| <b>Support</b>                    |    |                                                                                                                                                                                                 |                                     |                                     |                |
| Sources                           | 5a | Indicate sources of financial or other support for the review                                                                                                                                   | <input checked="" type="checkbox"/> | <input type="checkbox"/>            | 257-260        |
| Sponsor                           | 5b | Provide name for the review funder and/or sponsor                                                                                                                                               | <input checked="" type="checkbox"/> | <input type="checkbox"/>            | 257-260        |
| Role of sponsor/funder            | 5c | Describe roles of funder(s), sponsor(s), and/or institution(s), if any, in developing the protocol                                                                                              | <input checked="" type="checkbox"/> | <input type="checkbox"/>            | 257-260        |
| <b>INTRODUCTION</b>               |    |                                                                                                                                                                                                 |                                     |                                     |                |
| <b>Rationale</b>                  | 6  | Describe the rationale for the review in the context of what is already known                                                                                                                   | <input checked="" type="checkbox"/> | <input type="checkbox"/>            | 62-86          |
| <b>Objectives</b>                 | 7  | Provide an explicit statement of the question(s) the review will address with reference to participants, interventions, comparators, and outcomes (PICO)                                        | <input checked="" type="checkbox"/> | <input type="checkbox"/>            | 87-89          |
| <b>METHODS</b>                    |    |                                                                                                                                                                                                 |                                     |                                     |                |

| Section/topic                             | #   | Checklist item                                                                                                                                                                                                                              | Information reported                |                                     | Line number(s) |
|-------------------------------------------|-----|---------------------------------------------------------------------------------------------------------------------------------------------------------------------------------------------------------------------------------------------|-------------------------------------|-------------------------------------|----------------|
|                                           |     |                                                                                                                                                                                                                                             | Yes                                 | No                                  |                |
| <b>Eligibility criteria</b>               | 8   | Specify the study characteristics (e.g., PICO, study design, setting, time frame) and report characteristics (e.g., years considered, language, publication status) to be used as criteria for eligibility for the review                   | <input checked="" type="checkbox"/> | <input type="checkbox"/>            | 102-124        |
| <b>Information sources</b>                | 9   | Describe all intended information sources (e.g., electronic databases, contact with study authors, trial registers, or other grey literature sources) with planned dates of coverage                                                        | <input checked="" type="checkbox"/> | <input type="checkbox"/>            | 145-154        |
| <b>Search strategy</b>                    | 10  | Present draft of search strategy to be used for at least one electronic database, including planned limits, such that it could be repeated                                                                                                  | <input checked="" type="checkbox"/> | <input type="checkbox"/>            | 145-154        |
| <b>STUDY RECORDS</b>                      |     |                                                                                                                                                                                                                                             |                                     |                                     |                |
| <b>Data management</b>                    | 11a | Describe the mechanism(s) that will be used to manage records and data throughout the review                                                                                                                                                | <input type="checkbox"/>            | <input checked="" type="checkbox"/> |                |
| <b>Selection process</b>                  | 11b | State the process that will be used for selecting studies (e.g., two independent reviewers) through each phase of the review (i.e., screening, eligibility, and inclusion in meta-analysis)                                                 | <input checked="" type="checkbox"/> | <input type="checkbox"/>            | 157-162        |
| <b>Data collection process</b>            | 11c | Describe planned method of extracting data from reports (e.g., piloting forms, done independently, in duplicate), any processes for obtaining and confirming data from investigators                                                        | <input checked="" type="checkbox"/> | <input type="checkbox"/>            | 165-175        |
| <b>Data items</b>                         | 12  | List and define all variables for which data will be sought (e.g., PICO items, funding sources), any pre-planned data assumptions and simplifications                                                                                       | <input checked="" type="checkbox"/> | <input type="checkbox"/>            | 165-175        |
| <b>Outcomes and prioritization</b>        | 13  | List and define all outcomes for which data will be sought, including prioritization of main and additional outcomes, with rationale                                                                                                        | <input checked="" type="checkbox"/> | <input type="checkbox"/>            | 165-175        |
| <b>Risk of bias in individual studies</b> | 14  | Describe anticipated methods for assessing risk of bias of individual studies, including whether this will be done at the outcome or study level, or both; state how this information will be used in data synthesis                        | <input checked="" type="checkbox"/> | <input type="checkbox"/>            | 178-185        |
| <b>DATA</b>                               |     |                                                                                                                                                                                                                                             |                                     |                                     |                |
| <b>Synthesis</b>                          | 15a | Describe criteria under which study data will be quantitatively synthesized                                                                                                                                                                 | <input checked="" type="checkbox"/> | <input type="checkbox"/>            | 188-207        |
|                                           | 15b | If data are appropriate for quantitative synthesis, describe planned summary measures, methods of handling data, and methods of combining data from studies, including any planned exploration of consistency (e.g., $I^2$ , Kendall's tau) | <input checked="" type="checkbox"/> | <input type="checkbox"/>            | 188-219        |
|                                           | 15c | Describe any proposed additional analyses (e.g., sensitivity or subgroup analyses, meta-regression)                                                                                                                                         | <input checked="" type="checkbox"/> | <input type="checkbox"/>            | 220-226        |
|                                           | 15d | If quantitative synthesis is not appropriate, describe the type of summary planned                                                                                                                                                          | <input type="checkbox"/>            | <input checked="" type="checkbox"/> |                |
| <b>Meta-bias(es)</b>                      | 16  | Specify any planned assessment of meta-bias(es) (e.g., publication bias across studies, selective reporting within studies)                                                                                                                 | <input checked="" type="checkbox"/> | <input type="checkbox"/>            | 227-231        |
| <b>Confidence in cumulative evidence</b>  | 17  | Describe how the strength of the body of evidence will be assessed (e.g., GRADE)                                                                                                                                                            | <input checked="" type="checkbox"/> | <input type="checkbox"/>            | 234-242        |

# BMJ Open

## Exercise interventions for ankylosing spondylitis: A protocol for a Bayesian network meta-analysis

|                                 |                                                                                                                                                                                                                                                                                                                                                                                                                                                                          |
|---------------------------------|--------------------------------------------------------------------------------------------------------------------------------------------------------------------------------------------------------------------------------------------------------------------------------------------------------------------------------------------------------------------------------------------------------------------------------------------------------------------------|
| Journal:                        | <i>BMJ Open</i>                                                                                                                                                                                                                                                                                                                                                                                                                                                          |
| Manuscript ID                   | bmjopen-2019-029991.R2                                                                                                                                                                                                                                                                                                                                                                                                                                                   |
| Article Type:                   | Protocol                                                                                                                                                                                                                                                                                                                                                                                                                                                                 |
| Date Submitted by the Author:   | 17-May-2019                                                                                                                                                                                                                                                                                                                                                                                                                                                              |
| Complete List of Authors:       | Kan, Shun-Li; Tianjin Union Medical Center, Department of Spine Surgery<br>Chen, Lingxiao; University of Sydney, Institute of Bone and Joint Research, The Kolling institute, Sydney Medical School<br>Yuan, Zhi-Fang; Tianjin Medical University General Hospital, Department of Respiratory and Critical Care Medicine<br>Hu, Wei; Tianjin Union Medical Center, Department of Spine Surgery<br>Zhu, Ru-Sen; Tianjin Union Medical Center, Department of Spine Surgery |
| <b>Primary Subject Heading</b>: | Sports and exercise medicine                                                                                                                                                                                                                                                                                                                                                                                                                                             |
| Secondary Subject Heading:      | Rheumatology                                                                                                                                                                                                                                                                                                                                                                                                                                                             |
| Keywords:                       | exercise, ankylosing spondylitis, network meta-analysis, Bayesian                                                                                                                                                                                                                                                                                                                                                                                                        |
|                                 |                                                                                                                                                                                                                                                                                                                                                                                                                                                                          |

SCHOLARONE™  
Manuscripts

1  
2  
3  
4 **1 Exercise interventions for ankylosing spondylitis: A protocol for a Bayesian**  
5 **2 network meta-analysis**  
6  
7  
8  
9  
10  
11  
12

13  
14  
15  
16  
17  
18  
19  
20  
21  
22  
23  
24  
25  
26  
27  
28  
29  
30  
31  
32  
33  
34  
35  
36  
37  
38  
39  
40  
41  
42  
43  
44  
45  
46  
47  
48  
49  
50  
51  
52  
53  
54  
55  
56  
57  
58  
59  
60

4 Shun-Li Kan<sup>1</sup>, Ling-Xiao Chen<sup>2</sup>, Zhi-Fang Yuan<sup>3</sup>, Wei Hu<sup>1</sup>, Ru-Sen Zhu<sup>1</sup>

6 <sup>1</sup>Department of Spine Surgery, Tianjin Union Medical Center, 190 Jieyuan Road,  
7 Hongqiao District, Tianjin, China

8 <sup>2</sup>Institute of Bone and Joint Research, The Kolling institute, Sydney Medical School,  
9 The University of Sydney

10 <sup>3</sup>Department of Respiratory and Critical Care Medicine, Tianjin Medical University  
11 General Hospital, 154 Anshan Road, Heping District, Tianjin, China

12  
13 S-LK and L-XC contributed equally to this work.

14  
15 Correspondence to

16 Dr Ru-Sen Zhu;

17 rszhuspine@163.com



## 31 **ABSTRACT**

32 **Introduction:** Ankylosing spondylitis (AS) is a universal chronic inflammatory  
33 rheumatic disease which predominantly results in chronic back pain and stiffness.  
34 However, some patients suffering from AS do not react well to pharmacological  
35 interventions. Exercise intervention has been employed for the treatment of AS and  
36 works as a complementary part of the management of AS. However, the effect of  
37 different types of exercise interventions remain unclear. The purpose of this study is to  
38 determine the relative efficacy of different types of exercise interventions for  
39 individuals with AS using a Bayesian network meta-analysis.

40 **Methods and analysis:** We will conduct a systematic literature review of randomized  
41 controlled trials that compare different types of exercise interventions for individuals  
42 with AS. PubMed, EMBASE and the Cochrane Library will be searched up to February  
43 2019. The primary outcomes are functional capacity, pain, and disease activity. The  
44 risk of bias for individual studies will be evaluated according to the Cochrane  
45 Handbook. A Bayesian network meta-analysis will be performed to compare the  
46 efficacy of different types of exercise interventions. The quality of evidence will be  
47 assessed by the Grading of Recommendations, Assessment, Development and  
48 Evaluation (GRADE) approach.

49 **Ethics and dissemination:** Ethical approval and patient consent are not required since  
50 this study is a meta-analysis based on published studies. The results of this network  
51 meta-analysis will be submitted to a peer-reviewed journal for publication.

52 **Protocol registration number:** PROSPERO CRD42019123099.

### 53 **Strengths and limitations of this study**

- 54 ■ This is the most comprehensive review comparing the efficacy of different types  
55 of exercise interventions for individuals with AS through a Bayesian network meta-  
56 analysis.
- 57 ■ The main strength is that only randomized controlled trials will be included.
- 58 ■ We will use the Grading of Recommendations Assessment, Development and  
59 Evaluation (GRADE) approach to evaluate the quality of evidence.
- 60 ■ The duration of some trials is too short to provide decisive evidence on the effects

1  
2  
3  
4 61 of exercise interventions.

5  
6 62 **INTRODUCTION**

7  
8 63 Ankylosing spondylitis (AS) is a universal chronic inflammatory rheumatic disease  
9  
10 64 which predominantly influences the axial skeleton (e.g., spine, hips and shoulders).<sup>1 2</sup>  
11  
12 65 AS is characterized by inflammatory back pain which is caused by sacroiliitis and  
13  
14 66 spondylitis.<sup>1</sup> Inflammatory back pain may happen in 70% to 80% of patients with AS.  
15  
16 67 AS commonly starts early and about 10% to 20% of patients with AS commence to  
17  
18 68 develop the first symptoms before 16 years of age.<sup>3 4</sup> It has reported that estimates for  
19  
20 69 the prevalence of AS vary from 0.01% to 1.8%.<sup>5</sup> Patients with AS often experience  
21  
22 70 chronic back pain, stiffness, arthritis and enthesitis, which seriously affect patients'  
23  
24 71 health and quality of life, disturb their recreational activities, work, family life and  
25  
26 72 relationships, and result in considerable psychological distress and fears.

27  
28 73 Non-steroidal anti-inflammatory drugs (NSAIDs), including COX-2 inhibitors,  
29  
30 74 are recommended as the first-line drug intervention for reducing pain and stiffness.  
31  
32 75 Biological disease modifying antirheumatic drugs have also proved effective for the  
33  
34 76 manage inhibitors, the anti-interleukin-17 inhibitor, and so on.<sup>6</sup> However, some patients  
35  
36 77 suffering from AS do not react well to pharmacological interventions.<sup>7</sup> Exercise is  
37  
38 78 recommended by several guidelines as a co-intervention in combination with  
39  
40 79 pharmacological interventions to treat patients with AS.<sup>2 8</sup> Previous systematic  
41  
42 80 reviews<sup>9-11</sup> demonstrated that exercises have significant positive effects on pain, spinal  
43  
44 81 mobility, and physical function. However, they did not classify different types of  
45  
46 82 exercise, such as group exercise, individualized exercise, supervised exercise, home-  
47  
48 83 based exercise, and so on. Therefore, we do not know which is the best one. When no  
49  
50 84 studies exist that directly compare all relevant treatment choices, a network meta-  
51  
52 85 analysis can be performed by comparing the relative effects of treatments against a  
53  
54 86 common comparator or combining a variety of comparisons that are taken together  
55  
56 87 from one or more chains linking the treatments of interest.<sup>12</sup>

57  
58 88 Therefore, the purpose of this study is to comprehensively review the literature and  
59  
60 89 determine the relative efficacy of different types of exercise interventions for  
90  
91 90 individuals with AS using a Bayesian network meta-analysis.

1  
2  
3  
4 915 92 **METHODS**6 93 **Design**

7  
8  
9 94 A network meta-analysis using a Bayesian framework will be implemented in this study.  
10  
11 95 This protocol of network meta-analysis will be performed on the basis of the Preferred  
12  
13 96 Reporting Items for Systematic review and Meta-Analysis Protocol (PRISMA-P),<sup>13</sup> and  
14  
15 97 the reporting of the following network meta-analysis will obey the PRISMA extension  
16  
17 98 statement for reporting of systematic reviews incorporating network meta-analysis of  
18  
19 99 health care interventions.<sup>14</sup> This study has been registered at PROSPERO  
20  
21 100 (<http://www.crd.york.ac.uk/PROSPERO>) with registration number CRD42019123099.  
22

23 101

24  
25 102 **Eligibility criteria**26  
27 103 1. Type of study

28  
29 104 We will include randomized controlled trials comparing different exercise interventions,  
30  
31 105 and/or comparing a specific exercise intervention with no treatment, standard care or  
32  
33 106 usual physical activity. For cross-over studies, we only use the data before wash-out  
34  
35 107 period. We will not restrain the language or date of publication. We will divide the trial  
36  
37 108 duration into short-term follow-up (6 months) and long-term follow-up (12 months). If  
38  
39 109 the trial duration is closer to 6 months or 12 months, we will classify the trial duration  
40  
41 110 as short-term follow-up or long-term follow-up.

42  
43 111 2. Participants

44  
45 112 Trials enrolling adults, aged at least 18 years, with a diagnosis of AS according to the  
46  
47 113 Modified New York criteria<sup>15</sup> or the Amor criteria<sup>16</sup> or radiographic axial  
48  
49 114 spondyloarthritis (SpA) according to the criteria for axial SpA defined by the  
50  
51 115 Assessment of Spondyloarthritis International Society (ASAS)<sup>17</sup> will be included.

52  
53 116 We will exclude studies involving participants with non-radiographic axial SpA  
54  
55 117 according to the criteria for axial SpA defined by the ASAS.

56  
57 118 3. Type of interventions

58  
59 119 Any type of exercise interventions will be included. Exercise intervention is defined as  
60  
120 a type of physical activity that is planned, structured and repeated over a period of

1  
2  
3  
4 121 time.<sup>18</sup>

5 122 Trials that compare an exercise intervention combined with a co-intervention  
6  
7 123 versus the co-intervention alone or the exercise intervention alone (e.g., an exercise  
8  
9 124 intervention plus anti-TNF $\alpha$  therapy versus anti-TNF $\alpha$  therapy alone, an exercise  
10  
11 125 intervention plus spa therapy versus the exercise intervention) will be considered.

12  
13 126 Trails investigating exercise interventions with different setting (home, hospital, or  
14  
15 127 elsewhere) or different delivery method (individual, group, supervision, or mixed) will  
16  
17 128 be included.

18  
19 129 Trials comparing an exercise intervention with no treatment, standard care or usual  
20  
21 130 physical activity will be considered.

## 22 23 131 4. Outcomes of interest

### 24 25 132 4.1 Primary outcomes

26  
27 133 The Bath Ankylosing Spondylitis Functional Index (BASFI)<sup>19</sup> is 10 item index that  
28  
29 134 evaluate the functional capacity in performing daily activities of patients with AS.  
30  
31 135 Higher score of the BASFI reflects greater impairment in functional capacity.

32  
33 136 Pain will be measured based on a visual analogue scale (VAS) or numerical rating  
34  
35 137 scale (NRS). We will record data on back pain at night, total back pain, overall pain at  
36  
37 138 night, or overall pain. We will collect the highest pain score from the mentioned  
38  
39 139 alternatives. And the highest pain score on numeric value will be regarded as the final  
40  
41 140 pain score.

42  
43 141 The Bath Ankylosing Spondylitis Disease Activity Index (BASDAI)<sup>20</sup> is the gold  
44  
45 142 standard for measuring and evaluating disease activity in AS. Higher score of the  
46  
47 143 BASDAI indicates greater disease activity.

### 48 49 144 4.2 Secondary outcomes

50  
51 145 The Medical Outcomes Study 36-Item Short-Form General Health Survey (SF-36) will  
52  
53 146 be used to evaluate the quality of life, with higher scores indicating better quality of  
54  
55 147 life.

56  
57 148 The Bath Ankylosing Spondylitis Metrology Index (BASMI)<sup>21</sup> is the most widely  
58  
59 149 reported, validated objective axial mobility measure, which consists of five steps:  
60  
150 cervical rotation, tragus to wall distance, lumbar side flexion, modified Schober's test

1  
2  
3  
4 151 and intermalleolar distance. High scores mean severer limitation of movement.  
5  
6 152

7  
8 153 **Data sources and search strategy**

9 154 We will systematically search PubMed, EMBASE and the Cochrane Library for  
10  
11 155 primary studies up to February 2019. The search strategy will combine free text words  
12  
13 156 and medical subject headings regarding exercise, spondyloarthritis and randomized  
14  
15 157 controlled trials. The detail of the search strategy for PubMed is shown in online  
16  
17 158 supplementary file S1. This search strategy will be modified as required for other  
18  
19 159 databases. Furthermore, we will also retrieve the World Health Organization (WHO)  
20  
21 160 International Clinical Trials Registry Platform and ClinicalTrials.gov to identify  
22  
23 161 ongoing trial registers. We will examine bibliographies of pertinent systematic reviews  
24  
25 162 and meta-analyses for additional related studies. We will not limit language of  
26  
27 163 publication or publication period.  
28

29 164

30  
31 165 **Study selection**

32  
33 166 Two reviewers will independently check the titles and abstracts through the initial  
34  
35 167 retrieval. Publications not fulfilling the eligibility criteria will be eliminated. After  
36  
37 168 excluding the irrelevant publications, we will examine the full text of the remaining  
38  
39 169 publications based on the same eligibility criteria. Any discrepancies will be settled by  
40  
41 170 discussion and consensus. Excluded publications and the reasons for exclusion will be  
42  
43 171 reported and confirmed by a third investigator.  
44

45 172

46 173 **Data extraction**

47  
48 174 Data from included publications will be independently extracted by two reviewers using  
49  
50 175 a standardized data abstraction list. The following characteristic information will be  
51  
52 176 extracted: study characteristics (first author, publication year, study year, number of  
53  
54 177 centers, country and sponsor), patient characteristics (sample size, mean age, gender  
55  
56 178 ratio, the stage of the disease, and inclusion/exclusion criteria), intervention details for  
57  
58 179 each treatment group (e.g., number of intervention groups, exercise modality and the  
59  
60 180 detailed description, frequency and duration of the intervention, the duration of follow-

1  
2  
3  
4 181 up, and co-interventions) and outcome measures (BASFI, BASDAI, BASMI, pain, and  
5  
6 182 SF-36). We will prioritize the data at the end of the studies compared with the changes  
7  
8 183 from baseline in all the outcomes. Numerical data will be extracted to calculate pooled  
9  
10 184 estimations. If the study only reports SE, p value or CI, we will convert them into SD.<sup>22</sup>  
11  
12 185 If the study reports median and IQR, we will calculate SD by dividing the IQR by 1.35  
13  
14 186 and considering the median equivalent to the mean.<sup>22</sup> If the data are not reported in the  
15  
16 187 texts directly, we will infer them from the associated graphs. If data cannot be obtained,  
17  
18 188 we will contact the corresponding authors. Any disagreements will be settled by  
19  
20 189 discussion and consensus.

### 21 190 22 23 191 **Risk of bias assessment**

24  
25 192 The Cochrane Risk of Bias Tool will be used to appraise the risk of bias for individual  
26  
27 193 studies.<sup>23</sup> Each study will be evaluated and scored as high, low, or unclear risk of bias  
28  
29 194 based on the following criteria: randomization, allocation concealment, blinding of  
30  
31 195 participants and personnel, blinding of outcome assessors, incomplete outcome data,  
32  
33 196 selective reporting and other biases. A study with a high risk of bias in one or more  
34  
35 197 domains will be viewed as high risk of bias. A study with a low risk of bias in all  
36  
37 198 domains will be considered as low risk of bias. If not, a study will be treated as unclear  
38  
39 199 risk of bias. Any disagreements were resolved by discussion and consensus.

### 40 200 41 42 201 **Statistical analysis**

43  
44 202 A traditional pairwise meta-analysis will be done when at least two studies exist for an  
45  
46 203 outcome. A random-effects model with the Hartung-Knapp-Sidik-Jonkstra method<sup>24</sup>  
47  
48 204 will be used to estimate the effect size and 95% confidence interval (CI) accounting for  
49  
50 205 methodological and clinical heterogeneity across studies, with Stata, version 13.0 (Stata  
51  
52 206 Corp, College Station, TX).<sup>25</sup> We will use mean difference (MD) for a certain outcome  
53  
54 207 when more than 50 percent studies reporting the outcome use the same measurement.  
55  
56 208 Otherwise, standardized mean difference (SMD) will be used. The extent of between-  
57  
58 209 trial heterogeneity will be assessed with  $I^2$  statistic, with values over 50% indicating  
59  
60 210 considerable heterogeneity.<sup>26</sup>

1  
2  
3  
4 211 We will perform network meta-analyses to merge direct and indirect comparisons.  
5  
6 212 All network meta-analyses will be conducted using a Bayesian Markov chain Monte  
7  
8 213 Carlo (MCMC) framework in R version 3.2.5 software ([https://cran.r-](https://cran.r-project.org/src/base/R-3/)  
9  
10 214 [project.org/src/base/R-3/](https://cran.r-project.org/src/base/R-3/)) via the gemtc version 0.8-2 package. MD and 95% credible  
11  
12 215 interval (CrI) will be used as summary statistics to quantify the effect of different  
13  
14 216 exercise interventions. Random-effects and consistency models will be adopted in this  
15  
16 217 network meta-analysis, as they are considered to be the most conservative approach to  
17  
18 218 dealing with between-study heterogeneity.<sup>27</sup> To generate posterior distributions of  
19  
20 219 model parameters, 150 000 iterations of MCMC after 50 000 tuning iterations in three  
21  
22 220 chains will be run.<sup>28</sup> Convergence of iterations will be examined with the Gelman-  
23  
24 221 Rubin-Brooks diagnostic plots.<sup>29</sup> For any specific outcome, we will rank the probability  
25  
26 222 of each intervention being the best (superior to all other interventions), second best,  
27  
28 223 third best, etc.

29 224 The posterior mean residual deviance, an absolute measure of fit, will be computed.  
30  
31 225 The value of posterior mean residual deviance and the number of independent data  
32  
33 226 points will be assessed to check if the model fits the data satisfactorily.<sup>30</sup> To appraise  
34  
35 227 the consistency, we will use the following methods. Firstly, the model fit from the  
36  
37 228 consistency model will be compared with that from the inconsistency model.<sup>31</sup>  
38  
39 229 Secondly, network meta-analysis results (indirect evidence using the node-split  
40  
41 230 approach) will be compared with pairwise meta-analysis results (direct evidence in a  
42  
43 231 frequentist framework).<sup>32</sup>

44 232 Clinical and methodological heterogeneity will be evaluated by checking the  
45  
46 233 characteristics and design of the included studies. Statistical heterogeneity in the  
47  
48 234 network will be assessed according to the heterogeneity parameter ( $I^2$  or  $\tau^2$ ) derived  
49  
50 235 from the network meta-analysis.  $I^2$  more than 50% indicates substantial heterogeneity.  
51  
52 236 Heterogeneity will be explored by fitting covariates (ie, mean age, sample size, the  
53  
54 237 duration of symptoms, the dose of exercise (frequency  $\times$  duration intensity), and the  
55  
56 238 duration of follow-up) in network meta-regression analyses.<sup>33</sup> Subgroup analyses will  
57  
58 239 be further conducted ground on the duration of symptoms (early or long-term disease)  
59  
60 240 and concomitant pharmacological treatment (anti-TNF agents, NSAIDs, or other

1  
2  
3  
4 241 pharmacological interventions), if possible. Sensitivity analyses will be executed to test  
5  
6 242 the robustness of outcomes by limiting analyses to studies with low risk of bias.

7  
8 243 To examine the potential of small-study effects in the network, comparison-  
9  
10 244 adjusted funnel plots will be produced.<sup>34</sup> For the comparison-adjusted funnel plot, the  
11  
12 245 horizontal axis will represent the difference between study-specific effect sizes and the  
13  
14 246 comparison-specific summary effect. In the absence of small-study effects, the  
15  
16 247 comparison-adjusted funnel plot should be symmetric around the zero line.

17  
18 248

### 19 249 **Quality of evidence**

20  
21 250 We will follow the Grading of Recommendations, Assessment, Development and  
22  
23 251 Evaluation (GRADE) four-step approach to grade the quality of treatment effect  
24  
25 252 estimations from network meta-analysis.<sup>35</sup> Firstly, present direct and indirect treatment  
26  
27 253 estimates for each comparison of the evidence network. Secondly, rate the quality of  
28  
29 254 each direct and indirect effect estimate. Then, present the network meta-analysis  
30  
31 255 estimate for each comparison of the evidence network. At last, rate the quality of each  
32  
33 256 network meta-analysis effect estimate. According to risk of bias, inconsistency,  
34  
35 257 indirectness, imprecision and publication bias, the quality of evidence will be graded as  
36  
37 258 high, moderate, low, or very low.

38  
39 259

### 40 260 **Patient and Public Involvement**

41  
42 261 Patients or public will not be involved.

43  
44 262

## 45 263 **ETHICS AND DISSEMINATION**

### 46 264 **Ethical issues**

47  
48 265 As no primary data collection will be undertaken, no additional formal ethical  
49  
50 266 assessment and no informed consent are required.

51  
52 267

### 53 268 **Publication plan**

54  
55 269 This network meta-analysis will be submitted to a peer-reviewed journal. It will be  
56  
57 270 disseminated electronically and in print.



1  
2  
3  
4 271

5 272 **Contributors** S-LK, L-XC, Z-FY and R-SZ participated in the conception and design  
6  
7 273 of the study, including search strategy development. S-LK, L-XC, Z-FY and WH tested  
8  
9 274 the feasibility of the study. S-LK wrote the manuscript. All the authors critically  
10  
11 275 reviewed this manuscript and approved the final version.  
12

13 276

14  
15 277 **Funding** This work was supported by Tianjin Municipal Science and Technology  
16  
17 278 Commission (16KG158), and Foundation of Tianjin Union Medical Center  
18  
19 279 (2018YJ010). The funders had no role in study design, data collection and analysis,  
20  
21 280 decision to publish, or preparation of the manuscript.  
22

23 281

24  
25 282 **Competing interests** None declared.  
26

27 283

28  
29 284 **Patient consent for publication** Not required.  
30

31 285

32  
33 286 **Provenance and peer review** Not commissioned; externally peer reviewed.  
34

35 287

36  
37 288 **REFERENCES**

- 38 289 1. Baraliakos X, Haibel H, Listing J, et al. Continuous long-term anti-TNF therapy does not lead to an  
39 290 increase in the rate of new bone formation over 8 years in patients with ankylosing spondylitis.  
40 291 *Ann Rheum Dis* 2014;73(4):710-5. doi: 10.1136/annrheumdis-2012-202698 [published Online  
41 292 First: 2013/03/19]  
42  
43 293 2. van der Heijde D, Ramiro S, Landewe R, et al. 2016 update of the ASAS-EULAR management  
44 294 recommendations for axial spondyloarthritis. *Ann Rheum Dis* 2017;76(6):978-91. doi:  
45 295 10.1136/annrheumdis-2016-210770 [published Online First: 2017/01/15]  
46  
47 296 3. Colbert RA. Classification of juvenile spondyloarthritis: Enthesitis-related arthritis and beyond.  
48 297 *Nature reviews Rheumatology* 2010;6(8):477-85. doi: 10.1038/nrrheum.2010.103 [published  
49 298 Online First: 2010/07/08]  
50  
51 299 4. Ramanathan A, Srinivasalu H, Colbert RA. Update on juvenile spondyloarthritis. *Rheumatic diseases*  
52 300 *clinics of North America* 2013;39(4):767-88. doi: 10.1016/j.rdc.2013.06.002 [published Online  
53 301 First: 2013/11/05]  
54  
55 302 5. van Tubergen A. The changing clinical picture and epidemiology of spondyloarthritis. *Nature reviews*  
56 303 *Rheumatology* 2015;11(2):110-8. doi: 10.1038/nrrheum.2014.181 [published Online First:  
57 304 2014/11/12]  
58  
59 305 6. Taurog JD, Chhabra A, Colbert RA. Ankylosing Spondylitis and Axial Spondyloarthritis. *The New*  
60

- 1  
2  
3 306 *England journal of medicine* 2016;374(26):2563-74. doi: 10.1056/NEJMra1406182 [published  
4 307 Online First: 2016/06/30]
- 5  
6 308 7. Sieper J, Braun J, Dougados M, et al. Axial spondyloarthritis. *Nature reviews Disease primers*  
7 309 2015;1:15013. doi: 10.1038/nrdp.2015.13 [published Online First: 2015/01/01]
- 8  
9 310 8. Ward MM, Deodhar A, Akl EA, et al. American College of Rheumatology/Spondylitis Association of  
10 311 America/Spondyloarthritis Research and Treatment Network 2015 Recommendations for the  
11 312 Treatment of Ankylosing Spondylitis and Nonradiographic Axial Spondyloarthritis. *Arthritis &*  
12 313 *rheumatology (Hoboken, NJ)* 2016;68(2):282-98. doi: 10.1002/art.39298 [published Online  
13 314 First: 2015/09/25]
- 14  
15 315 9. Dagfinrud H, Kvien TK, Hagen KB. Physiotherapy interventions for ankylosing spondylitis. *The*  
16 316 *Cochrane database of systematic reviews* 2008;(1):Cd002822. doi:  
17 317 10.1002/14651858.CD002822.pub3 [published Online First: 2008/02/07]
- 18  
19 318 10. Martins NA, Furtado GE, Campos MJ, et al. Exercise and ankylosing spondylitis with New York  
20 319 modified criteria: a systematic review of controlled trials with meta-analysis. *Acta*  
21 320 *reumatologica portuguesa* 2014;39(4):298-308. [published Online First: 2014/10/30]
- 22  
23 321 11. Pecourneau V, Degboe Y, Barnetche T, et al. Effectiveness of Exercise Programs in Ankylosing  
24 322 Spondylitis: A Meta-Analysis of Randomized Controlled Trials. *Archives of physical medicine*  
25 323 *and rehabilitation* 2018;99(2):383-89.e1. doi: 10.1016/j.apmr.2017.07.015 [published  
26 324 Online First: 2017/09/02]
- 27  
28 325 12. Lu G, Ades AE. Combination of direct and indirect evidence in mixed treatment comparisons.  
29 326 *Statistics in medicine* 2004;23(20):3105-24. doi: 10.1002/sim.1875 [published Online First:  
30 327 2004/09/28]
- 31  
32 328 13. Moher D, Shamseer L, Clarke M, et al. Preferred reporting items for systematic review and meta-  
33 329 analysis protocols (PRISMA-P) 2015 statement. *Systematic reviews* 2015;4:1. doi:  
34 330 10.1186/2046-4053-4-1 [published Online First: 2015/01/03]
- 35  
36 331 14. Hutton B, Salanti G, Caldwell DM, et al. The PRISMA extension statement for reporting of systematic  
37 332 reviews incorporating network meta-analyses of health care interventions: checklist and  
38 333 explanations. *Ann Intern Med* 2015;162(11):777-84. doi: 10.7326/m14-2385 [published Online  
39 334 First: 2015/06/02]
- 40  
41 335 15. van der Linden S, Valkenburg HA, Cats A. Evaluation of diagnostic criteria for ankylosing spondylitis.  
42 336 A proposal for modification of the New York criteria. *Arthritis Rheum* 1984;27(4):361-8.  
43 337 [published Online First: 1984/04/01]
- 44  
45 338 16. Amor B, Dougados M, Mijiyawa M. Criteria of the classification of spondylarthropathies. *Revue du*  
46 339 *rhumatisme et des maladies osteo-articulaires* 1990;57(2):85-9. [published Online First:  
47 340 1990/02/01]
- 48  
49 341 17. Rudwaleit M, van der Heijde D, Landewe R, et al. The development of Assessment of  
50 342 SpondyloArthritis international Society classification criteria for axial spondyloarthritis (part  
51 343 II): validation and final selection. *Ann Rheum Dis* 2009;68(6):777-83. doi:  
52 344 10.1136/ard.2009.108233 [published Online First: 2009/03/20]
- 53  
54 345 18. Bouchard C, Blair S, Haskell W. Physical Activity and Health. Human Kinetics, Inc, 2007.
- 55  
56 346 19. Calin A, Garrett S, Whitelock H, et al. A new approach to defining functional ability in ankylosing  
57 347 spondylitis: the development of the Bath Ankylosing Spondylitis Functional Index. *The Journal*  
58 348 *of rheumatology* 1994;21(12):2281-5. [published Online First: 1994/12/01]
- 59  
349 20. Garrett S, Jenkinson T, Kennedy LG, et al. A new approach to defining disease status in ankylosing

- 1  
2  
3 350 spondylitis: the Bath Ankylosing Spondylitis Disease Activity Index. *The Journal of*  
4 351 *rheumatology* 1994;21(12):2286-91. [published Online First: 1994/12/01]
- 6 352 21. Jenkinson TR, Mallorie PA, Whitelock HC, et al. Defining spinal mobility in ankylosing spondylitis (AS).  
7 353 The Bath AS Metrology Index. *The Journal of rheumatology* 1994;21(9):1694-8. [published  
8 354 Online First: 1994/09/01]
- 10 355 22. Higgins JPT, Green S (editors). Cochrane Handbook for Systematic Reviews of Interventions Version  
11 356 5.1.0 [updated March 2011]. The Cochrane Collaboration, 2011. Available from  
12 357 [www.cochrane-handbook.org](http://www.cochrane-handbook.org).
- 14 358 23. Higgins JP, Altman DG, Gotzsche PC, et al. The Cochrane Collaboration's tool for assessing risk of  
15 359 bias in randomised trials. *Bmj* 2011;343:d5928. doi: 10.1136/bmj.d5928 [published Online  
16 360 First: 2011/10/20]
- 18 361 24. Veroniki AA, Jackson D, Viechtbauer W, et al. Recommendations for quantifying the uncertainty in  
19 362 the summary intervention effect and estimating the between-study heterogeneity variance in  
20 363 random-effects meta-analysis. *The Cochrane database of systematic reviews* 2015(Suppl 1):25-  
21 364 27.
- 23 365 25. DerSimonian R, Laird N. Meta-analysis in clinical trials. *Controlled clinical trials* 1986;7(3):177-88.  
24 366 [published Online First: 1986/09/01]
- 26 367 26. Higgins JP, Thompson SG, Deeks JJ, et al. Measuring inconsistency in meta-analyses. *Bmj*  
27 368 2003;327(7414):557-60. doi: 10.1136/bmj.327.7414.557 [published Online First: 2003/09/06]
- 28 369 27. Mills EJ, Thorlund K, Ioannidis JP. Demystifying trial networks and network meta-analysis. *Bmj*  
29 370 2013;346:f2914. doi: 10.1136/bmj.f2914 [published Online First: 2013/05/16]
- 31 371 28. Toft N, Innocent GT, Gettinby G, et al. Assessing the convergence of Markov Chain Monte Carlo  
32 372 methods: an example from evaluation of diagnostic tests in absence of a gold standard.  
33 373 *Preventive veterinary medicine* 2007;79(2-4):244-56. doi: 10.1016/j.prevetmed.2007.01.003  
34 374 [published Online First: 2007/02/13]
- 36 375 29. Gelman A, Rubin DB. Markov chain Monte Carlo methods in biostatistics. *Statistical methods in*  
37 376 *medical research* 1996;5(4):339-55. [published Online First: 1996/12/01]
- 38 377 30. Dias S, Sutton AJ, Ades AE, et al. Evidence synthesis for decision making 2: a generalized linear  
39 378 modeling framework for pairwise and network meta-analysis of randomized controlled trials.  
40 379 *Medical decision making : an international journal of the Society for Medical Decision Making*  
41 380 2013;33(5):607-17. doi: 10.1177/0272989x12458724 [published Online First: 2012/10/30]
- 43 381 31. Dias S, Welton NJ, Sutton AJ, et al. Evidence synthesis for decision making 4: inconsistency in  
44 382 networks of evidence based on randomized controlled trials. *Medical decision making : an*  
45 383 *international journal of the Society for Medical Decision Making* 2013;33(5):641-56. doi:  
46 384 10.1177/0272989x12455847 [published Online First: 2013/06/28]
- 48 385 32. Dias S, Welton NJ, Caldwell DM, et al. Checking consistency in mixed treatment comparison meta-  
49 386 analysis. *Statistics in medicine* 2010;29(7-8):932-44. doi: 10.1002/sim.3767 [published Online  
50 387 First: 2010/03/10]
- 52 388 33. Dias S, Sutton AJ, Welton NJ, et al. Evidence synthesis for decision making 3: heterogeneity--  
53 389 subgroups, meta-regression, bias, and bias-adjustment. *Medical decision making : an*  
54 390 *international journal of the Society for Medical Decision Making* 2013;33(5):618-40. doi:  
55 391 10.1177/0272989x13485157 [published Online First: 2013/06/28]
- 57 392 34. Chaimani A, Higgins JP, Mavridis D, et al. Graphical tools for network meta-analysis in STATA. *PLoS*  
58 393 *One* 2013;8(10):e76654. doi: 10.1371/journal.pone.0076654 [published Online First:

1  
2  
3  
4  
5  
6  
7  
8  
9  
10  
11  
12  
13  
14  
15  
16  
17  
18  
19  
20  
21  
22  
23  
24  
25  
26  
27  
28  
29  
30  
31  
32  
33  
34  
35  
36  
37  
38  
39  
40  
41  
42  
43  
44  
45  
46  
47  
48  
49  
50  
51  
52  
53  
54  
55  
56  
57  
58  
59  
60

394 2013/10/08]  
395 35. Puhan MA, Schunemann HJ, Murad MH, et al. A GRADE Working Group approach for rating the  
396 quality of treatment effect estimates from network meta-analysis. *Bmj* 2014;349:g5630. doi:  
397 10.1136/bmj.g5630 [published Online First: 2014/09/26]  
398

For peer review only

**PubMed**

---

- 1  
2  
3  
4  
5  
6  
7 #1 "Randomized Controlled Trial" [Publication Type] OR "Controlled Clinical Trial" [Publication Type]  
8  
9 #2 (((((placebo[Title/Abstract]) OR randomized[Title/Abstract]) OR randomly[Title/Abstract]) OR trial[Title/Abstract]) OR  
10 groups[Title/Abstract]  
11  
12 #3 ("Animals"[Mesh]) NOT "Humans"[Mesh]  
13  
14 #4 (#1 OR #2) NOT #3  
15  
16 #5 "Spondylarthritis"[Mesh]  
17  
18 #6 "Spondylitis, Ankylosing"[Mesh]  
19  
20 #7 "Sacroiliitis"[Mesh]  
21  
22 #8 ((((((Bechterew Disease[Title/Abstract]) OR Marie-Struempell Disease[Title/Abstract]) OR Ankylosing Spondylitis[Title/Abstract])  
23 OR AS[Title/Abstract]) OR axSpA[Title/Abstract]) OR axial spondyloarthritis[Title/Abstract]  
24  
25 #9 (((axial[Title/Abstract]) OR spin\*[Title/Abstract]) OR peripheral[Title/Abstract]) OR vertebral[Title/Abstract]  
26  
27 #10 (((joint\*[Title/Abstract]) OR spondyloarthritis[Title/Abstract]) OR arthritis[Title/Abstract]) OR ankylosing[Title/Abstract]  
28  
29 #11 #9 AND #10  
30  
31 #12 #5 OR #6 OR #7 OR #8 OR #11  
32  
33 #13 "Exercise"[Mesh]  
34  
35 #14 "Exercise Therapy"[Mesh]  
36  
37  
38  
39  
40  
41  
42  
43  
44  
45  
46
-

- 
- 1  
2  
3  
4
- 5 #15 "Exercise Movement Techniques"[Mesh]  
6  
7 #16 "Physical Therapy Modalities"[Mesh]  
8  
9 #17 "Motor Activity"[Mesh]  
10  
11 #18 "Rehabilitation"[Mesh]  
12  
13 #19 "Proprioception"[Mesh]  
14  
15 #20 (((((program\*[Title/Abstract]) OR therap\*[Title/Abstract]) OR behavior\*[Title/Abstract]) OR intervention\*[Title/Abstract]) OR  
16 train\*[Title/Abstract]) OR activit\*[Title/Abstract])  
17  
18 #21 exercise AND #20  
19  
20 #22 physical AND #20  
21  
22 #23 (((AS[Title/Abstract]) OR non drug\*[Title/Abstract]) OR non pharmacological\*[Title/Abstract]) OR complementary[Title/Abstract]  
23  
24 #24 ((management[Title/Abstract]) OR intervention\*[Title/Abstract]) OR treatment\*[Title/Abstract]  
25  
26 #25 #23 AND #24  
27  
28 #26 ((((((Train\*[Title/Abstract]) OR exercise\*[Title/Abstract]) OR therap\*[Title/Abstract]) OR fitness[Title/Abstract]) OR  
29 program\*[Title/Abstract]) OR reeducation[Title/Abstract]) OR rehab\*[Title/Abstract])  
30  
31 #27 (((home[Title/Abstract]) OR water[Title/Abstract]) OR spa[Title/Abstract]) OR group[Title/Abstract]  
32  
33 #28 #26 AND #27  
34  
35 #29 (((((((((sport\*[Title/Abstract]) OR recreation\*[Title/Abstract]) OR walk\*[Title/Abstract]) OR swim\*[Title/Abstract]) OR  
36  
37  
38  
39  
40  
41  
42  
43  
44  
45  
46
-

---

bike\*[Title/Abstract]) OR cycl\*[Title/Abstract]) OR ergomet\*[Title/Abstract]) OR danc\*[Title/Abstract]) OR yoga[Title/Abstract])

OR tai chi [Title/Abstract]

#30 (hydrotherapy[Title/Abstract]) OR balneotherapy[Title/Abstract]

#31 #13 OR #14 OR #15 OR #16 OR #17 OR #18 OR #19 OR #21 OR #22 OR #25 OR #28 OR #29 OR #30

#32 #4 AND #12 AND # 31

---

## PRISMA-P 2015 Checklist

This checklist has been adapted for use with protocol submissions to *Systematic Reviews* from Table 3 in Moher D et al: Preferred reporting items for systematic review and meta-analysis protocols (PRISMA-P) 2015 statement. *Systematic Reviews* 2015 4:1

| Section/topic                     | #  | Checklist item                                                                                                                                                                                  | Information reported                |                                     | Line number(s) |
|-----------------------------------|----|-------------------------------------------------------------------------------------------------------------------------------------------------------------------------------------------------|-------------------------------------|-------------------------------------|----------------|
|                                   |    |                                                                                                                                                                                                 | Yes                                 | No                                  |                |
| <b>ADMINISTRATIVE INFORMATION</b> |    |                                                                                                                                                                                                 |                                     |                                     |                |
| <b>Title</b>                      |    |                                                                                                                                                                                                 |                                     |                                     |                |
| Identification                    | 1a | Identify the report as a protocol of a systematic review                                                                                                                                        | <input checked="" type="checkbox"/> | <input type="checkbox"/>            | 1-2            |
| Update                            | 1b | If the protocol is for an update of a previous systematic review, identify as such                                                                                                              | <input type="checkbox"/>            | <input checked="" type="checkbox"/> |                |
| <b>Registration</b>               | 2  | If registered, provide the name of the registry (e.g., PROSPERO) and registration number in the Abstract                                                                                        | <input checked="" type="checkbox"/> | <input type="checkbox"/>            | 49             |
| <b>Authors</b>                    |    |                                                                                                                                                                                                 |                                     |                                     |                |
| Contact                           | 3a | Provide name, institutional affiliation, and e-mail address of all protocol authors; provide physical mailing address of corresponding author                                                   | <input checked="" type="checkbox"/> | <input type="checkbox"/>            | 6-17           |
| Contributions                     | 3b | Describe contributions of protocol authors and identify the guarantor of the review                                                                                                             | <input checked="" type="checkbox"/> | <input type="checkbox"/>            | 253-256        |
| <b>Amendments</b>                 | 4  | If the protocol represents an amendment of a previously completed or published protocol, identify as such and list changes; otherwise, state plan for documenting important protocol amendments | <input type="checkbox"/>            | <input checked="" type="checkbox"/> |                |
| <b>Support</b>                    |    |                                                                                                                                                                                                 |                                     |                                     |                |
| Sources                           | 5a | Indicate sources of financial or other support for the review                                                                                                                                   | <input checked="" type="checkbox"/> | <input type="checkbox"/>            | 257-260        |
| Sponsor                           | 5b | Provide name for the review funder and/or sponsor                                                                                                                                               | <input checked="" type="checkbox"/> | <input type="checkbox"/>            | 257-260        |
| Role of sponsor/funder            | 5c | Describe roles of funder(s), sponsor(s), and/or institution(s), if any, in developing the protocol                                                                                              | <input checked="" type="checkbox"/> | <input type="checkbox"/>            | 257-260        |
| <b>INTRODUCTION</b>               |    |                                                                                                                                                                                                 |                                     |                                     |                |
| <b>Rationale</b>                  | 6  | Describe the rationale for the review in the context of what is already known                                                                                                                   | <input checked="" type="checkbox"/> | <input type="checkbox"/>            | 62-86          |
| <b>Objectives</b>                 | 7  | Provide an explicit statement of the question(s) the review will address with reference to participants, interventions, comparators, and outcomes (PICO)                                        | <input checked="" type="checkbox"/> | <input type="checkbox"/>            | 87-89          |
| <b>METHODS</b>                    |    |                                                                                                                                                                                                 |                                     |                                     |                |



| Section/topic                      | #   | Checklist item                                                                                                                                                                                                                              | Information reported                |                                     | Line number(s) |
|------------------------------------|-----|---------------------------------------------------------------------------------------------------------------------------------------------------------------------------------------------------------------------------------------------|-------------------------------------|-------------------------------------|----------------|
|                                    |     |                                                                                                                                                                                                                                             | Yes                                 | No                                  |                |
| Eligibility criteria               | 8   | Specify the study characteristics (e.g., PICO, study design, setting, time frame) and report characteristics (e.g., years considered, language, publication status) to be used as criteria for eligibility for the review                   | <input checked="" type="checkbox"/> | <input type="checkbox"/>            | 102-124        |
| Information sources                | 9   | Describe all intended information sources (e.g., electronic databases, contact with study authors, trial registers, or other grey literature sources) with planned dates of coverage                                                        | <input checked="" type="checkbox"/> | <input type="checkbox"/>            | 145-154        |
| Search strategy                    | 10  | Present draft of search strategy to be used for at least one electronic database, including planned limits, such that it could be repeated                                                                                                  | <input checked="" type="checkbox"/> | <input type="checkbox"/>            | 145-154        |
| <b>STUDY RECORDS</b>               |     |                                                                                                                                                                                                                                             |                                     |                                     |                |
| Data management                    | 11a | Describe the mechanism(s) that will be used to manage records and data throughout the review                                                                                                                                                | <input type="checkbox"/>            | <input checked="" type="checkbox"/> |                |
| Selection process                  | 11b | State the process that will be used for selecting studies (e.g., two independent reviewers) through each phase of the review (i.e., screening, eligibility, and inclusion in meta-analysis)                                                 | <input checked="" type="checkbox"/> | <input type="checkbox"/>            | 157-162        |
| Data collection process            | 11c | Describe planned method of extracting data from reports (e.g., piloting forms, done independently, in duplicate), any processes for obtaining and confirming data from investigators                                                        | <input checked="" type="checkbox"/> | <input type="checkbox"/>            | 165-175        |
| Data items                         | 12  | List and define all variables for which data will be sought (e.g., PICO items, funding sources), any pre-planned data assumptions and simplifications                                                                                       | <input checked="" type="checkbox"/> | <input type="checkbox"/>            | 165-175        |
| Outcomes and prioritization        | 13  | List and define all outcomes for which data will be sought, including prioritization of main and additional outcomes, with rationale                                                                                                        | <input checked="" type="checkbox"/> | <input type="checkbox"/>            | 165-175        |
| Risk of bias in individual studies | 14  | Describe anticipated methods for assessing risk of bias of individual studies, including whether this will be done at the outcome or study level, or both; state how this information will be used in data synthesis                        | <input checked="" type="checkbox"/> | <input type="checkbox"/>            | 178-185        |
| <b>DATA</b>                        |     |                                                                                                                                                                                                                                             |                                     |                                     |                |
| Synthesis                          | 15a | Describe criteria under which study data will be quantitatively synthesized                                                                                                                                                                 | <input checked="" type="checkbox"/> | <input type="checkbox"/>            | 188-207        |
|                                    | 15b | If data are appropriate for quantitative synthesis, describe planned summary measures, methods of handling data, and methods of combining data from studies, including any planned exploration of consistency (e.g., $I^2$ , Kendall's tau) | <input checked="" type="checkbox"/> | <input type="checkbox"/>            | 188-219        |
|                                    | 15c | Describe any proposed additional analyses (e.g., sensitivity or subgroup analyses, meta-regression)                                                                                                                                         | <input checked="" type="checkbox"/> | <input type="checkbox"/>            | 220-226        |
|                                    | 15d | If quantitative synthesis is not appropriate, describe the type of summary planned                                                                                                                                                          | <input type="checkbox"/>            | <input checked="" type="checkbox"/> |                |
| Meta-bias(es)                      | 16  | Specify any planned assessment of meta-bias(es) (e.g., publication bias across studies, selective reporting within studies)                                                                                                                 | <input checked="" type="checkbox"/> | <input type="checkbox"/>            | 227-231        |
| Confidence in cumulative evidence  | 17  | Describe how the strength of the body of evidence will be assessed (e.g., GRADE)                                                                                                                                                            | <input checked="" type="checkbox"/> | <input type="checkbox"/>            | 234-242        |
