# Supplementary material for: Exercise interventions for ankylosing spondylitis: a protocol for a Bayesian network meta-analysis
Source: PubMed Central journal article supplement — BMJ Open. 2019 Jun 16;9(6):e029991. doi: 10.1136/bmjopen-2019-029991 (PMC6588988; doi:10.1136/bmjopen-2019-029991), 2019-06-16
Supplement: bmjopen-2019-029991supp001.pdf [file bmjopen-2019-029991supp001.pdf]

## PubMed

---

- #1 "Randomized Controlled Trial" [Publication Type] OR "Controlled Clinical Trial" [Publication Type]
  - #2 (((placebo[Title/Abstract]) OR randomized[Title/Abstract]) OR randomly[Title/Abstract]) OR trial[Title/Abstract]) OR groups[Title/Abstract]
  - #3 ("Animals"[Mesh]) NOT "Humans"[Mesh]
  - #4 (#1 OR #2) NOT #3
  - #5 "Spondylarthritis"[Mesh]
  - #6 "Spondylitis, Ankylosing"[Mesh]
  - #7 "Sacroiliitis"[Mesh]
  - #8 (((((Bechterew Disease[Title/Abstract]) OR Marie-Struempell Disease[Title/Abstract]) OR Ankylosing Spondylitis[Title/Abstract]) OR AS[Title/Abstract]) OR axSpA[Title/Abstract]) OR axial spondyloarthritis[Title/Abstract]
  - #9 (((axial[Title/Abstract]) OR spin\*[Title/Abstract]) OR peripheral[Title/Abstract]) OR vertebral[Title/Abstract]
  - #10 (((joint\*[Title/Abstract]) OR spondyloarthritis[Title/Abstract]) OR arthritis[Title/Abstract]) OR ankylosing[Title/Abstract]
  - #11 #9 AND #10
  - #12 #5 OR #6 OR #7 OR #8 OR #11
  - #13 "Exercise"[Mesh]
  - #14 "Exercise Therapy"[Mesh]
-

---

#15 "Exercise Movement Techniques"[Mesh]  
#16 "Physical Therapy Modalities"[Mesh]  
#17 "Motor Activity"[Mesh]  
#18 "Rehabilitation"[Mesh]  
#19 "Proprioception"[Mesh]  
#20 (((((program\*[Title/Abstract]) OR therap\*[Title/Abstract]) OR behavior\*[Title/Abstract]) OR intervention\*[Title/Abstract]) OR train\*[Title/Abstract]) OR activit\*[Title/Abstract])  
#21 exercise AND #20  
#22 physical AND #20  
#23 (((AS[Title/Abstract]) OR non drug\*[Title/Abstract]) OR non pharmacological\*[Title/Abstract]) OR complementary[Title/Abstract]  
#24 ((management[Title/Abstract]) OR intervention\*[Title/Abstract]) OR treatment\*[Title/Abstract]  
#25 #23 AND #24  
#26 ((((((Train\*[Title/Abstract]) OR exercise\*[Title/Abstract]) OR therap\*[Title/Abstract]) OR fitness[Title/Abstract]) OR program\*[Title/Abstract]) OR reeducation[Title/Abstract]) OR rehab\*[Title/Abstract]  
#27 (((home[Title/Abstract]) OR water[Title/Abstract]) OR spa[Title/Abstract]) OR group[Title/Abstract]  
#28 #26 AND #27  
#29 (((((((((sport\*[Title/Abstract]) OR recreation\*[Title/Abstract]) OR walk\*[Title/Abstract]) OR swim\*[Title/Abstract]) OR

---

---

bike\*[Title/Abstract]) OR cycl\*[Title/Abstract]) OR ergomet\*[Title/Abstract]) OR danc\*[Title/Abstract]) OR yoga[Title/Abstract])  
OR tai chi [Title/Abstract]

#30 (hydrotherapy[Title/Abstract]) OR balneotherapy[Title/Abstract]

#31 #13 OR #14 OR #15 OR #16 OR #17 OR #18 OR #19 OR #21 OR #22 OR #25 OR #28 OR #29 OR #30

#32 #4 AND #12 AND # 31

---
